# Supplementary material for: One-pot Ugi-azide and Heck reactions for the synthesis of heterocyclic systems containing tetrazole and 1,2,3,4-tetrahydroisoquinoline
Source: publisher site journal article supplement (doi:10.3762/bjoc.20.81), 2024-04-23

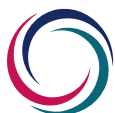

## Supporting Information

for

### **One-pot Ugi-azide and Heck reactions for the synthesis of heterocyclic systems containing tetrazole and 1,2,3,4-tetrahydroisoquinoline**

Jiawei Niu, Yuhui Wang, Shenghu Yan, Yue Zhang, Xiaoming Ma, Qiang Zhang and Wei Zhang

*Beilstein J. Org. Chem.* **2024**, *20*, 912–920. [doi:10.3762/bjoc.20.81](https://doi.org/10.3762/bjoc.20.81)

### **General reaction procedures, compound characterization data, and copies of NMR spectra**

## Table of contents

|                                                                                                |    |
|------------------------------------------------------------------------------------------------|----|
| 1. General information.....                                                                    | S1 |
| 2. Analytical data of products.....                                                            | S1 |
| 3. X-ray report of <b>6d</b> and <b>8c</b> .....                                               | S6 |
| 4. <sup>1</sup> H NMR, <sup>13</sup> C NMR of products <b>5a</b> , <b>6</b> and <b>8</b> ..... | S8 |

## 1. General information

Chemicals and solvents were purchased from commercial source and used without further purification.  $^1\text{H}$  (300 MHz, 400 MHz),  $^{13}\text{C}$  NMR spectra (75 MHz or 126 MHz) were recorded on a Bruker NMR spectrometer. LC-MS were performed on an Agilent 2100 system with C18 column (5.0  $\mu\text{m}$ , 6.0  $\times$  50 mm). The mobile phases were MeOH and  $\text{H}_2\text{O}$  both containing 0.05% trifluoroacetic acid. A linear gradient was used to increase from 25:75 (v/v) MeOH/ $\text{H}_2\text{O}$  to 100% MeOH in 7.0 min at a flow rate of 0.7 mL/min. UV detections were conducted at 210 nm, 254 nm, and 365 nm. Low resolution mass spectra were recorded in APCI (atmospheric pressure chemical ionization). HRMS were performed on Agilent 6540 Q-TOF mass spectrometer (ESI). Flash column chromatography was performed using silica gel (200–300 mesh).

## 2. Analytical data of products

*N*-((2-Bromophenyl)(1-(*tert*-butyl)-1*H*-tetrazol-5-yl)methyl)prop-2-en-1-amine (5a)

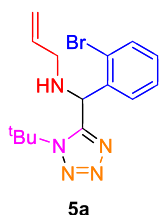

White solid, 321mg, 92% yield.  $^1\text{H}$  NMR (400 MHz, Chloroform-*d*)  $\delta$  7.59 (dd,  $J = 7.9, 1.5$  Hz, 1H), 7.20 (dd,  $J = 7.5, 1.4$  Hz, 1H), 7.16–7.11 (m, 1H), 7.08 (dd,  $J = 7.6, 1.8$  Hz, 1H), 5.94 (dddd,  $J = 18.4, 9.5, 7.2, 5.4$  Hz, 1H), 5.72 (s, 1H), 5.10 (t,  $J = 1.5$  Hz, 1H), 5.07 (dd,  $J = 6.2, 1.6$  Hz, 1H), 3.42–3.32 (m, 1H), 3.19–3.12 (m, 1H), 2.36 (s, 1H), 1.57 (s, 9H).  $^{13}\text{C}$  NMR (101 MHz, Chloroform-*d*)  $\delta$  154.7, 138.2, 136.0, 133.6, 130.0, 129.0, 128.3, 124.3, 117.6, 61.6, 56.2, 50.9, 29.8. HRMS (ESI) calcd for  $\text{C}_{15}\text{H}_{20}\text{BrN}_5$  ( $[\text{M}+\text{Na}]^+$ ): 372.0800, found 372.0792.

*1*-(1-(*tert*-Butyl)-1*H*-tetrazol-5-yl)-4-methylene-1,2,3,4-tetrahydroisoquinoline (6a)

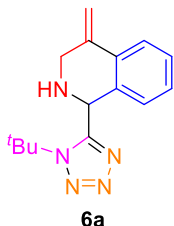

Light yellow oil, 161mg, 60% yield.  $^1\text{H}$  NMR (400 MHz, Chloroform-*d*)  $\delta$  7.73 (dd,  $J = 8.0, 1.4$  Hz, 1H), 7.29 (d,  $J = 7.5$  Hz, 1H), 7.17 (d,  $J = 1.3$  Hz, 1H), 6.66 (d,  $J = 7.7$  Hz, 1H), 5.74 (s, 1H), 5.61 (s, 1H), 5.04 (s, 1H), 3.80 (d,  $J = 15.2$  Hz, 1H), 3.68 (s, 1H), 2.03 (d,  $J = 16.7$  Hz, 1H), 1.85 (s, 9H).  $^{13}\text{C}$  NMR (101 MHz, Chloroform-*d*)  $\delta$  155.5, 138.8, 133.9, 133.0, 128.2, 128.0, 126.7, 124.5, 108.3, 62.1, 53.1, 48.6, 30.2. HRMS (ESI) calcd for  $\text{C}_{15}\text{H}_{19}\text{N}_5$  ( $[\text{M}+\text{Na}]^+$ ): 292.1538, found 292.1520.

*1*-(1-Benzyl-1*H*-tetrazol-5-yl)-4-methylene-1,2,3,4-tetrahydroisoquinoline (6b)

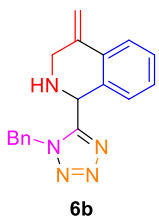

yellow oil, 174 mg, 58 yield.  $^1\text{H}$  NMR (300 MHz, Chloroform-*d*)  $\delta$  7.67 (dd,  $J = 8.0, 1.3$  Hz, 1H), 7.21 (dd,  $J = 5.2, 2.2$  Hz, 4H), 7.09–7.03 (m, 2H), 6.99 (td,  $J = 7.6, 1.3$  Hz, 1H), 6.52 (d,  $J = 7.8$  Hz, 1H), 5.66–5.55 (m, 3H), 5.48 (d,  $J = 14.9$  Hz, 1H), 5.04 (d,  $J = 1.4$  Hz, 1H), 3.68–3.54 (m, 2H), 2.47 (s, 1H).  $^{13}\text{C}$  NMR (101 MHz, DMSO-*d*<sub>6</sub>)  $\delta$  150.4, 133.5, 128.5, 127.6, 126.9, 123.5, 123.2, 123.0, 122.9, 122.7, 121.9, 119., 103.2, 72.4, 72.1, 71.8, 47.1, 46.2, 43.6. HRMS (ESI) calcd for  $\text{C}_{18}\text{H}_{17}\text{N}_5$  ( $[\text{M}+\text{Na}]^+$ ): 326.1832, found 326.1817.

9-Methylene-9,13b-dihydro-8*H*-tetrazolo[5',1':3,4]pyrazino[2,1-*a*]isoquinolin-6(5*H*)-one (6c)

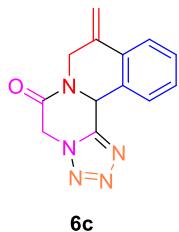

Light yellow solid, 192 mg, 76% yield.  $^1\text{H}$  NMR (400 MHz, Chloroform-*d*)  $\delta$  7.75 (d,  $J = 7.6$  Hz, 1H), 7.70 (d,  $J = 7.7$  Hz, 1H), 7.34 (dt,  $J = 15.8, 7.3$  Hz, 2H), 6.33 (s, 1H), 5.75 (s, 1H), 5.43 (d,  $J = 15.0$  Hz, 1H), 5.34 (s, 1H), 5.20 (d,  $J = 18.0$  Hz, 1H), 4.98 (d,  $J = 18.0$  Hz, 1H), 3.91 (d,  $J = 15.0$  Hz, 1H).  $^{13}\text{C}$  NMR (126 MHz, Chloroform-*d*)  $\delta$  159.5, 147.9, 135.5, 132.57, 129.8, 129.2, 129.0, 125.9, 124.9, 112.0, 53.7, 48.0, 47.8. HRMS (ESI) calcd for  $\text{C}_{13}\text{H}_{11}\text{N}_5\text{O}$  ( $[\text{M}+\text{Na}]^+$ ): 276.0866, found 276.0861.

11-Chloro-9-methylene-9,13b-dihydro-8H-tetrazolo[5',1':3,4]pyrazino[2,1-a]isoquinolin-6(5H)-one (6d)

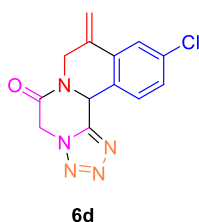

White solid, 215 mg, 75% yield. <sup>1</sup>H NMR (400 MHz, Chloroform-*d*) δ 7.78 (d, *J* = 8.5 Hz, 1H), 7.68 (d, *J* = 1.9 Hz, 1H), 7.31 (dd, *J* = 8.5, 1.9 Hz, 1H), 6.31 (s, 1H), 5.77 (s, 1H), 5.45 (d, *J* = 15.1 Hz, 1H), 5.42 (s, 1H), 5.24 (d, *J* = 18.0 Hz, 1H), 5.03 (d, *J* = 18.0 Hz, 1H), 3.90 (d, *J* = 15.0 Hz, 1H). <sup>13</sup>C NMR (126 MHz, Chloroform-*d*) δ 159.4, 147.7, 135.4, 134.5, 134.3, 129.0, 128.1, 127.6, 124.9, 113.3, 53.3, 47.8, 47.6. HRMS (ESI) calcd for C<sub>13</sub>H<sub>10</sub>ClN<sub>5</sub>O ([M+Na]<sup>+</sup>): 310.0472, found 310.0472.

9-Methylene-9,15b-dihydro-8H-benzo[*g*]tetrazolo[5',1':3,4]pyrazino[2,1-a]isoquinolin-6(5H)-one (6e)

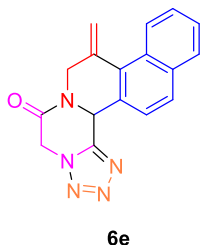

Light yellow solid, 230 mg, 76% yield. <sup>1</sup>H NMR (400 MHz, Chloroform-*d*) δ 8.38 (d, *J* = 8.0 Hz, 1H), 7.91 – 7.85 (m, 1H), 7.78 (d, *J* = 8.6 Hz, 1H), 7.62 – 7.52 (m, 2H), 7.34 (d, *J* = 8.6 Hz, 1H), 6.15 (s, 1H), 5.89 (s, 1H), 5.75 (d, *J* = 1.9 Hz, 1H), 5.24 (d, *J* = 17.9 Hz, 1H), 5.01 (dd, *J* = 16.5, 7.9 Hz, 2H), 4.30 (d, *J* = 15.0 Hz, 1H). <sup>13</sup>C NMR (126 MHz, Chloroform-*d*) δ 159.2, 147.3, 134.9, 134.1, 132.9, 130.0, 129.5, 128.8, 128.7, 127.5, 126.9, 124.9, 120.6, 120.2, 52.6, 50.0, 47.8. HRMS (ESI) calcd for C<sub>17</sub>H<sub>13</sub>N<sub>5</sub>O ([M+Na]<sup>+</sup>): 326.1011, found 326.1018.

12-Methoxy-9-methylene-9,13b-dihydro-8H-tetrazolo[5',1':3,4]pyrazino[2,1-a]isoquinolin-6(5H)-one (6f)

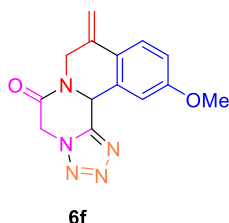

yellow solid, 206 mg, 73% yield. <sup>1</sup>H NMR (500 MHz, Chloroform-*d*) δ 7.60 (d, *J* = 8.8 Hz, 1H), 7.30 (d, *J* = 2.0 Hz, 1H), 6.85 (dd, *J* = 8.8, 2.6 Hz, 1H), 6.28 (s, 1H), 5.58 (d, *J* = 1.5 Hz, 1H), 5.38 (d, *J* = 14.9 Hz, 1H), 5.19 (s, 1H), 5.18 – 5.13 (m, 1H), 4.97 (dd, *J* = 17.9, 1.4 Hz, 1H), 3.85 (d, *J* = 14.9 Hz, 1H), 3.77 (s, 3H). <sup>13</sup>C NMR (126 MHz, Chloroform-*d*) δ 160.0, 159.4, 147.9, 135.0, 131.0, 126.3, 124.9, 115.7, 110.3, 109.5, 55.5, 53.8, 48.1, 47.7. HRMS (ESI) calcd for C<sub>14</sub>H<sub>13</sub>N<sub>5</sub>O<sub>2</sub> ([M+Na]<sup>+</sup>): 306.0979, found 306.0967.

11-Methyl-9-methylene-9,13b-dihydro-8H-tetrazolo[5',1':3,4]pyrazino[2,1-a]isoquinolin-6(5H)-one (6g)

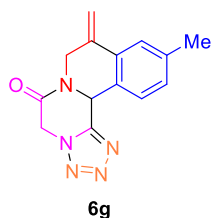

brown solid, 202 mg, 76% yield. <sup>1</sup>H NMR (400 MHz, Chloroform-*d*) δ 7.63 (d, *J* = 8.1 Hz, 1H), 7.51 (s, 1H), 7.13 (d, *J* = 8.1 Hz, 1H), 6.29 (s, 1H), 5.74 (s, 1H), 5.42 (d, *J* = 15.0 Hz, 1H), 5.32 (s, 1H), 5.20 (d, *J* = 18.0 Hz, 1H), 4.97 (d, *J* = 17.9 Hz, 1H), 3.89 (d, *J* = 15.0 Hz, 1H), 2.35 (s, 3H). <sup>13</sup>C NMR (126 MHz, Chloroform-*d*) δ 159.5, 148.1, 139.1, 135.6, 132.3, 129.8, 127.0, 125.8, 125.3, 111.7, 53.6, 48.1, 47.8, 21.2. HRMS (ESI) calcd for C<sub>14</sub>H<sub>13</sub>N<sub>5</sub>O ([M+Na]<sup>+</sup>): 290.1023, found 290.1018.

9-Methylene-9,14b-dihydro-8H-[1,3]dioxolo[4,5-*g*]tetrazolo[5',1':3,4]pyrazino[2,1-a]isoquinolin-6(5H)-one (6h)

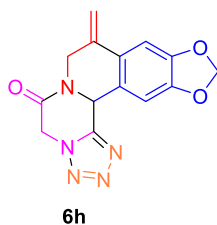

brown solid, 225 mg, 76% yield. <sup>1</sup>H NMR (500 MHz, Chloroform-*d*) δ 7.28 (s, 1H), 7.10 (s, 1H), 6.24 (s, 1H), 5.99 (d, *J* = 1.1 Hz, 1H), 5.94 (d, *J* = 1.1 Hz, 1H), 5.55 (d, *J* = 1.3 Hz, 1H), 5.39 (d, *J* = 14.9 Hz, 1H), 5.24 (s, 1H), 5.20 (d, *J* = 18.1 Hz, 1H), 4.99 (dd, *J* = 18.0, 1.3 Hz, 1H), 3.84 (d, *J* = 14.9 Hz, 1H). <sup>13</sup>C NMR (126 MHz, Chloroform-*d*) δ 159.5, 148.5, 148.5, 148.0, 135.3, 127.0, 123.9, 110.4, 106.1, 104.5, 101.8, 53.6, 47.9, 47.7. HRMS (ESI) calcd for C<sub>14</sub>H<sub>11</sub>N<sub>5</sub>O<sub>3</sub> ([M+Na]<sup>+</sup>): 320.0753, found 320.0760.

11,12-Dimethoxy-9-methylene-9,13b-dihydro-8H-tetrazolo[5',1':3,4]pyrazino[2,1-a]isoquinolin-6(5H)-one (6i)

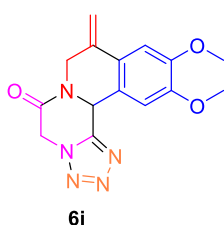

brown solid, 247 mg, 79% yield. <sup>1</sup>H NMR (500 MHz, Chloroform-*d*) δ 7.40 (s, 1H), 7.11 (s, 1H), 6.31 (s, 1H), 5.59 (d, *J* = 1.5 Hz, 1H), 5.43 (d, *J* = 14.8 Hz, 1H), 5.25 (s, 1H), 5.23 – 5.18 (m, 1H), 5.02 (dd, *J* = 18.0, 1.4 Hz, 1H), 3.90 (s, 3H), 3.86 (s, 3H), 3.84 (d, *J* = 14.8 Hz, 1H). <sup>13</sup>C NMR (126 MHz, Chloroform-*d*) δ 159.4, 149.9, 149.4, 148.2, 135.2, 125.0, 122.4, 109.5, 108.4, 106.8, 56.1, 56.0, 53.6, 48.1, 47.7. HRMS (ESI) calcd for C<sub>15</sub>H<sub>15</sub>N<sub>5</sub>O<sub>3</sub> ([M+Na]<sup>+</sup>): 336.1069, found 336.1069.

9-Methylene-11-(trifluoromethyl)-9,13b-dihydro-8H-tetrazolo[5',1':3,4]pyrazino[2,1-a]isoquinolin-6(5H)-one (6j)

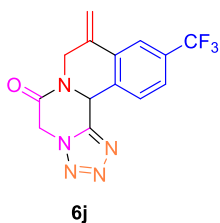

White solid, 237 mg, 74% yield.  $^1\text{H}$  NMR (500 MHz, Chloroform-*d*)  $\delta$  8.02 (d,  $J$  = 8.3 Hz, 1H), 7.95 (s, 1H), 7.59 (d,  $J$  = 8.3 Hz, 1H), 6.38 (s, 1H), 5.86 (s, 1H), 5.53 – 5.48 (m, 2H), 5.26 (d,  $J$  = 18.4 Hz, 1H), 5.04 (dd,  $J$  = 18.1, 1.2 Hz, 1H), 3.93 (d,  $J$  = 15.0 Hz, 1H).  $^{13}\text{C}$  NMR (126 MHz, Chloroform-*d*)  $\delta$  159.4, 147.5, 134.4, 133.5, 133.1, 131.8, 131.6, 127.0, 125.5, 121.9, 113.9, 53.5, 47.8, 47.7.  $^{19}\text{F}$  NMR (282 MHz, Chloroform-*d*)  $\delta$  -63.0. HRMS (ESI) calcd for  $\text{C}_{14}\text{H}_{10}\text{F}_3\text{N}_5\text{O}$  ( $[\text{M}+\text{Na}]^+$ ): 344.0759, found 344.0735.

6j

12-Fluoro-9-methylene-9,13b-dihydro-8H-tetrazolo[5',1':3,4]pyrazino[2,1-a]isoquinolin-6(5H)-one (6k)

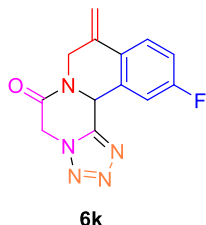

Light yellow solid, 208 mg, 77% yield.  $^1\text{H}$  NMR (500 MHz, Chloroform-*d*)  $\delta$  7.70 (dd,  $J$  = 8.8, 5.5 Hz, 1H), 7.59 (dd,  $J$  = 9.4, 2.4 Hz, 1H), 7.08 (td,  $J$  = 8.4, 2.6 Hz, 1H), 6.32 (s, 1H), 5.69 (s, 1H), 5.45 (d,  $J$  = 15.0 Hz, 1H), 5.34 (s, 1H), 5.24 (d,  $J$  = 18.0 Hz, 1H), 5.06 – 4.99 (m, 1H), 3.90 (d,  $J$  = 15.0 Hz, 1H).  $^{13}\text{C}$  NMR (126 MHz, Chloroform-*d*)  $\delta$  163.6, 161.6, 159.4, 147.6, 134.5, 131.7, 128.7, 127.0, 127.0, 116.7, 116.6, 113.4, 113.2, 111.8, 53.5, 47.9, 47.8.  $^{19}\text{F}$  NMR (282 MHz, Chloroform-*d*)  $\delta$  -109.9. HRMS (ESI) calcd for  $\text{C}_{13}\text{H}_{10}\text{FN}_5\text{O}$  ( $[\text{M}+\text{Na}]^+$ ): 294.0771, found 294.0767.

6k

2-Benzyl-1-(1-benzyl-1H-tetrazol-5-yl)-4-methylene-1,2,3,4-tetrahydroisoquinoline (8a)

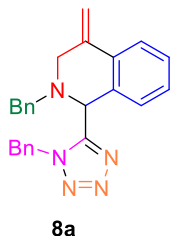

Light yellow solid, 290 mg, 74% yield.  $^1\text{H}$  NMR (400 MHz, Chloroform-*d*)  $\delta$  7.74 – 7.66 (m, 1H), 7.37 – 7.29 (m, 3H), 7.25 – 7.14 (m, 6H), 7.03 (d,  $J$  = 1.3 Hz, 1H), 6.86 – 6.78 (m, 2H), 6.53 (d,  $J$  = 7.8 Hz, 1H), 5.70 (s, 1H), 5.58 (d,  $J$  = 15.0 Hz, 1H), 5.36 (s, 1H), 5.23 (d,  $J$  = 15.0 Hz, 1H), 5.09 (s, 1H), 3.70 (dd,  $J$  = 27.4, 13.5 Hz, 2H), 3.51 (d,  $J$  = 13.5 Hz, 1H), 3.28 – 3.20 (m, 1H).  $^{13}\text{C}$  NMR (101 MHz, DMSO-*d*<sub>6</sub>)  $\delta$  155.9, 137.7, 136.7, 135.0, 132.7, 130.9, 129.5, 129.2, 128.9, 128.8, 128.7, 128.6, 128.4, 128.2, 127.9, 124.2, 111.0, 57.5, 56.5, 51.4, 50.7. HRMS (ESI) calcd for  $\text{C}_{25}\text{H}_{23}\text{N}_5$  ( $[\text{M}+\text{Na}]^+$ ): 416.1851, found 416.1834.

8a

2-Benzyl-1-(1-benzyl-1H-tetrazol-5-yl)-6-methyl-4-methylene-1,2,3,4-tetrahydroisoquinoline (8b)

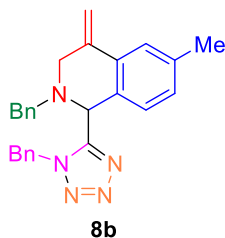

Colorless oil, 288 mg, 71% yield.  $^1\text{H}$  NMR (300 MHz, DMSO-*d*<sub>6</sub>)  $\delta$  7.71 – 7.63 (m, 1H), 7.31 (d,  $J$  = 2.2 Hz, 2H), 7.30 – 7.28 (m, 2H), 7.27 (d,  $J$  = 1.9 Hz, 2H), 7.14 (dd,  $J$  = 7.0, 2.5 Hz, 2H), 7.07 – 6.95 (m, 3H), 6.63 (d,  $J$  = 7.9 Hz, 1H), 5.82 (s, 1H), 5.78 – 5.70 (m, 1H), 5.51 (t,  $J$  = 7.7 Hz, 2H), 4.99 (s, 1H), 3.74 – 3.49 (m, 3H), 3.17 (d,  $J$  = 14.5 Hz, 1H), 2.31 (s, 3H).  $^{13}\text{C}$  NMR (75 MHz, DMSO-*d*<sub>6</sub>)  $\delta$  156.0, 137.7, 137.6, 136.9, 135.0, 132.4, 129.8, 129.5, 129.1, 129.0, 128.8, 128.6, 128.5, 128.2, 128.1, 127.9, 124.4, 110.7, 57.6, 56.4, 51.6, 50.7, 21.3. HRMS (ESI) calcd for  $\text{C}_{26}\text{H}_{25}\text{N}_5$  ( $[\text{M}+\text{Na}]^+$ ): 430.2008, found 430.2052.

8b

2-Benzyl-1-(1-benzyl-1H-tetrazol-5-yl)-6-chloro-4-methylene-1,2,3,4-tetrahydroisoquinoline (8c)

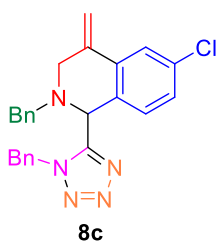

Light yellow solid, 281 mg, 66 % yield.  $^1\text{H}$  NMR (400 MHz, Chloroform-*d*)  $\delta$  7.93 (d,  $J$  = 2.2 Hz, 1H), 7.35 – 7.31 (m, 3H), 7.26 (dt,  $J$  = 5.9, 2.5 Hz, 4H), 7.16 – 7.10 (m, 2H), 7.08 (dd,  $J$  = 4.5, 1.8 Hz, 2H), 6.89 (d,  $J$  = 8.3 Hz, 1H), 5.97 (s, 1H), 5.74 (d,  $J$  = 15.5 Hz, 1H), 5.56 (d,  $J$  = 15.6 Hz, 2H), 5.08 (s, 1H), 3.68 (d,  $J$  = 13.0 Hz, 1H), 3.57 (d,  $J$  = 13.1 Hz, 1H), 3.50 (d,  $J$  = 14.7 Hz, 1H), 3.19 (d,  $J$  = 14.9 Hz, 1H).  $^{13}\text{C}$  NMR (101 MHz, Chloroform-*d*)  $\delta$  160.4, 142.4, 140.0, 139.8, 139.5, 138.1, 135.7, 134.3, 133.9, 133.6, 133.4, 133.3, 132.8, 132.7, 128.6, 117.8, 62.0, 60.7, 55.4. HRMS (ESI) calcd for  $\text{C}_{25}\text{H}_{22}\text{ClN}_5$  ( $[\text{M}+\text{Na}]^+$ ): 450.1461, found 450.1505.

8c

2-Benzyl-1-(1-benzyl-1H-tetrazol-5-yl)-4-methylene-6-(trifluoromethyl)-1,2,3,4-tetrahydroisoquinoline (**8d**)

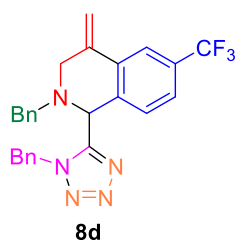

Light yellow solid, 331 mg, 72% yield. <sup>1</sup>H NMR (400 MHz, DMSO-*d*<sub>6</sub>) δ 8.19 (d, *J* = 1.9 Hz, 1H), 7.55 (dd, *J* = 8.2, 1.9 Hz, 1H), 7.34 – 7.30 (m, 3H), 7.26 (d, *J* = 2.5 Hz, 3H), 7.18 – 7.11 (m, 3H), 7.11 – 7.05 (m, 2H), 6.07 (d, *J* = 1.3 Hz, 1H), 5.77 (d, *J* = 15.5 Hz, 1H), 5.71 (d, *J* = 3.6 Hz, 1H), 5.60 (d, *J* = 15.5 Hz, 1H), 5.15 (s, 1H), 3.71 (d, *J* = 13.1 Hz, 1H), 3.64 – 3.50 (m, 2H), 3.24 (d, *J* = 15.0 Hz, 1H). <sup>13</sup>C NMR (101 MHz, DMSO-*d*<sub>6</sub>) δ 155.5, 137.6, 135.2, 134.0, 134.9, 133.8, 130.3, 129.5, 129.5, 129.3, 129.1, 129.1, 129.1, 129.0, 128.8, 128.6, 128.6, 128.1, 128.0, 127.9, 125.9, 125.0, 124.9, 123.2, 121.1, 121.1, 113.6, 57.3, 56.2, 50.7. <sup>19</sup>F NMR (376 MHz, DMSO-*d*<sub>6</sub>) δ -61.1. HRMS (ESI) calcd for C<sub>26</sub>H<sub>22</sub>F<sub>3</sub>N<sub>5</sub> ([M+Na]<sup>+</sup>):

484.1725, found 484.1752.

2-Benzyl-1-(1-benzyl-1H-tetrazol-5-yl)-7-methoxy-4-methylene-1,2,3,4-tetrahydroisoquinoline (**8e**)

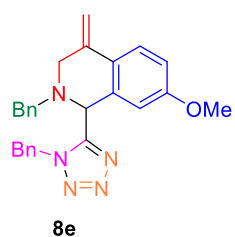

Light yellow solid, 287 mg, 68% yield. <sup>1</sup>H NMR (400 MHz, DMSO-*d*<sub>6</sub>) δ 7.80 (d, *J* = 8.8 Hz, 1H), 7.34 – 7.30 (m, 3H), 7.28 (d, *J* = 2.0 Hz, 1H), 7.27 (d, *J* = 1.9 Hz, 2H), 7.19 – 7.10 (m, 2H), 7.10 – 7.01 (m, 2H), 6.91 (dd, *J* = 8.8, 2.7 Hz, 1H), 6.28 (d, *J* = 2.6 Hz, 1H), 5.74 (s, 3H), 5.68 (s, 1H), 5.55 – 5.48 (m, 2H), 4.87 (s, 1H), 3.66 (d, *J* = 13.1 Hz, 1H), 3.61 (s, 3H), 3.17 (d, *J* = 14.7 Hz, 1H). <sup>13</sup>C NMR (101 MHz, DMSO-*d*<sub>6</sub>) δ 159.7, 155.8, 137.8, 136.3, 135.1, 132.2, 129.5, 129.1, 128.8, 128.6, 128.1, 127.9, 125.8, 125.5, 115.1, 112.7, 108.6, 57.5, 56.5, 55.6, 55.3, 51.5, 50.7. HRMS (ESI) calcd for C<sub>26</sub>H<sub>25</sub>N<sub>5</sub>O ([M+Na]<sup>+</sup>): 446.1957, found 446.1961.

6-Benzyl-5-(1-benzyl-1H-tetrazol-5-yl)-8-methylene-5,6,7,8-tetrahydro-[1,3]dioxolo[4,5-*g*]isoquinoline (**8f**)

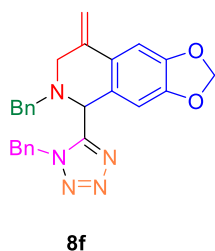

Light yellow solid, 319 mg, 73% yield. <sup>1</sup>H NMR (400 MHz, DMSO-*d*<sub>6</sub>) δ 7.39 (s, 1H), 7.36 – 7.30 (m, 3H), 7.27 (dd, *J* = 5.0, 1.9 Hz, 3H), 7.17 – 7.10 (m, 2H), 7.09 – 7.02 (m, 2H), 6.27 (s, 1H), 6.02 (d, *J* = 1.0 Hz, 1H), 5.98 (d, *J* = 1.0 Hz, 1H), 5.74 – 5.68 (m, 2H), 5.52 (d, *J* = 15.4 Hz, 1H), 5.42 (s, 1H), 4.89 (s, 1H), 3.74 – 3.55 (m, 2H), 3.54 – 3.45 (m, 1H), 3.14 (d, *J* = 14.7 Hz, 1H). <sup>13</sup>C NMR (101 MHz, DMSO-*d*<sub>6</sub>) δ 155.9, 148.1, 148.0, 137.8, 136.4, 135.1, 129.5, 129.1, 128.8, 128.6, 128.1, 127.9, 127.0, 124.7, 109.7, 107.8, 103.7, 101.7, 57.4, 56.5, 51.3, 50.6. HRMS (ESI) calcd for C<sub>26</sub>H<sub>23</sub>N<sub>5</sub>O<sub>2</sub> ([M+Na]<sup>+</sup>): 460.1749, found 460.1803.

2-Methyl-4-methylene-1-(1-(2,4,4-trimethylpentan-2-yl)-1H-tetrazol-5-yl)-1,2,3,4-tetrahydroisoquinoline (**8g**)

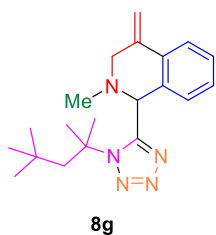

White solid, 230 mg, 68% yield. <sup>1</sup>H NMR (400 MHz, Chloroform-*d*) δ 7.78 (d, *J* = 7.9 Hz, 1H), 7.31 (t, *J* = 7.6 Hz, 1H), 7.22 (t, *J* = 7.5 Hz, 1H), 6.81 (d, *J* = 7.7 Hz, 1H), 5.76 (s, 1H), 5.33 (s, 1H), 5.12 (s, 1H), 3.85 (d, *J* = 14.4 Hz, 1H), 3.23 (d, *J* = 14.4 Hz, 1H), 2.43 (s, 3H), 2.11 (d, *J* = 14.7 Hz, 2H), 1.81 (s, 6H), 0.85 (s, 9H). <sup>13</sup>C NMR (101 MHz, Chloroform-*d*) δ 155.0, 132.4, 128.4, 127.8, 123.8, 110.0, 53.3, 31.6, 30.8, 29.8. HRMS (ESI) calcd for C<sub>20</sub>H<sub>29</sub>N<sub>5</sub> ([M+Na]<sup>+</sup>): 362.2321, found 362.2314.

6-Chloro-2-methyl-4-methylene-1-(1-(2,4,4-trimethylpentan-2-yl)-1H-tetrazol-5-yl)-1,2,3,4-tetrahydroisoquinoline (**8h**)

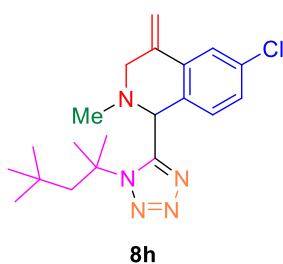

Light yellow solid, 257 mg, 69% yield. <sup>1</sup>H NMR (400 MHz, Chloroform-*d*) δ 7.71 (d, *J* = 2.2 Hz, 1H), 7.16 (dd, *J* = 8.2, 2.1 Hz, 1H), 6.75 (d, *J* = 8.3 Hz, 1H), 5.72 (s, 1H), 5.23 (s, 1H), 5.13 (s, 1H), 3.77 (d, *J* = 14.8 Hz, 1H), 3.18 (d, *J* = 14.7 Hz, 1H), 2.40 (s, 3H), 2.19 (d, *J* = 15.3 Hz, 1H), 2.05 (d, *J* = 14.9 Hz, 1H), 1.80 (s, 6H), 0.82 (s, 9H). <sup>13</sup>C NMR (101 MHz, Chloroform-*d*) δ 154.5, 134.2, 133.9, 129.6, 128.5, 123.8, 111.6, 66.3, 53.3, 31.6, 30.8, 30.1, 29.7. HRMS (ESI) calcd for C<sub>20</sub>H<sub>28</sub>ClN<sub>5</sub> ([M+Na]<sup>+</sup>): 396.1931, found 396.1923.

6,7-Dimethoxy-2-methyl-4-methylene-1-(1-(2,4,4-trimethylpentan-2-yl)-1H-tetrazol-5-yl)-1,2,3,4-tetrahydroisoquinoline (**8i**)

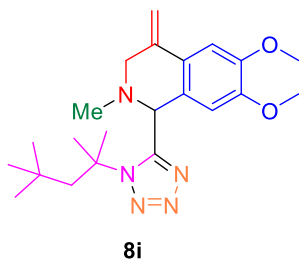

Light yellow solid, 263 mg, 66% yield.  $^1\text{H}$  NMR (400 MHz, Chloroform-*d*)  $\delta$  7.16 (s, 1H), 6.18 (s, 1H), 5.54 (s, 1H), 5.22 (s, 1H), 4.99 (s, 1H), 3.90 (s, 3H), 3.74 (dd,  $J = 14.3, 2.7$  Hz, 1H), 3.69 (s, 3H), 3.16 (d,  $J = 14.3$  Hz, 1H), 2.38 (s, 3H), 2.13 (d,  $J = 10.3$  Hz, 2H), 1.76 (d,  $J = 8.8$  Hz, 6H), 0.82 (s, 9H).

$^{13}\text{C}$  NMR (101 MHz, Chloroform-*d*)  $\delta$  155.07, 149.6, 148.7, 125.2, 108.0, 105.9, 55.9, 55.8, 53.3, 31.6, 30.9, 30.1. HRMS (ESI) calcd for  $\text{C}_{22}\text{H}_{33}\text{N}_5\text{O}_2$  ( $[\text{M}+\text{Na}]^+$ ): 422.2532, found 422.2106

6-Methyl-8-methylene-5-(1-(2,4,4-trimethylpentan-2-yl)-1H-tetrazol-5-yl)-5,6,7,8-tetrahydro-[1,3]dioxolo[4,5-*g*]isoquinoline (**8j**)

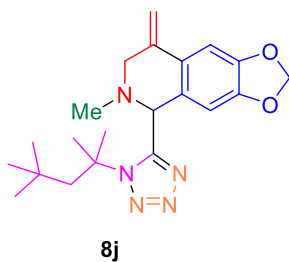

White solid, 252 mg, 66% yield.  $^1\text{H}$  NMR (400 MHz, Chloroform-*d*)  $\delta$  7.18 (s, 1H), 6.22 (s, 1H), 5.94 (d,  $J = 1.2$  Hz, 1H), 5.91 (d,  $J = 1.3$  Hz, 1H), 5.53 (s, 1H), 5.15 (s, 1H), 4.98 (s, 1H), 3.75 (d,  $J = 14.6$  Hz, 1H), 3.13 (d,  $J = 14.6$  Hz, 1H), 2.41 (s, 3H), 2.20 (d,  $J = 15.4$  Hz, 1H), 2.06 (s, 1H), 1.83 (d,  $J = 13.0$  Hz, 6H), 0.84 (s, 9H).  $^{13}\text{C}$  NMR (101 MHz, Chloroform-*d*)  $\delta$  154.9, 148.1, 147.7, 126.7, 108.6, 107.3, 103.4, 101.2, 53.2, 31.6, 30.8, 29.6. HRMS (ESI) calcd for  $\text{C}_{21}\text{H}_{29}\text{N}_5\text{O}_2$  ( $[\text{M}+\text{Na}]^+$ ): 406.2219, found 406.2231.

### 3. X-ray report of 6d and 8c

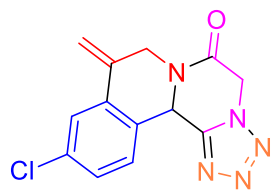

6d

CCDC: 2164364

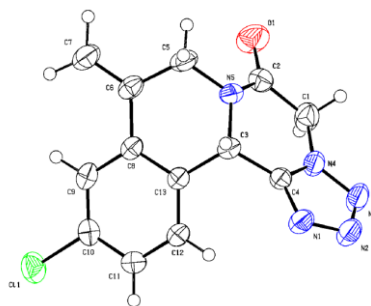

---

Bond precision: C-C = 0.0020 Å                      Wavelength=0.71073  
Cell:                      a=8.5083(11)                      b=14.3480(17)                      c=10.4672(13)  
                                    alpha=90                      beta=105.064(2)                      gamma=90  
Temperature:                      296 K

|                        | Calculated      | Reported        |
|------------------------|-----------------|-----------------|
| Volume                 | 1233.9(3)       | 1233.9(3)       |
| Space group            | P 21/c          | P 21/c          |
| Hall group             | -P 2ybc         | -P 2ybc         |
| Moiety formula         | C13 H10 Cl N5 O | ?               |
| Sum formula            | C13 H10 Cl N5 O | C13 H10 Cl N5 O |
| Mr                     | 287.71          | 287.71          |
| Dx, g cm <sup>-3</sup> | 1.549           | 1.549           |
| Z                      | 4               | 4               |
| Mu (mm <sup>-1</sup> ) | 0.313           | 0.313           |
| F000                   | 592.0           | 592.0           |
| F000'                  | 592.78          |                 |
| h, k, lmax             | 10, 17, 12      | 10, 17, 12      |
| Nref                   | 2165            | 2159            |
| Tmin, Tmax             | 0.922, 0.928    |                 |
| Tmin'                  | 0.922           |                 |

Correction method= Not given

Data completeness= 0.997                      Theta(max)= 24.993

R(reflections)= 0.0316( 1864)

wR2(reflections)=  
0.0829( 2159)

S = 1.086

Npar= 190



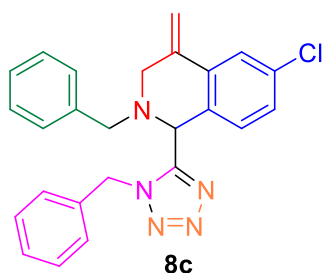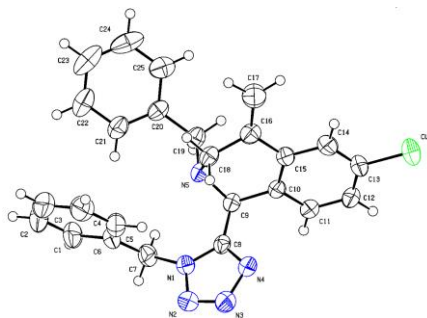

**CCDC: 2321622**

Bond precision: C-C = 0.0034 Å

Wavelength=0.71073

Cell: a=21.3467 (15)  
alpha=90

b=14.9952 (11)  
beta=90.794 (1)

c=6.8948 (5)  
gamma=90

Temperature: 296 K

|                        | Calculated                                        | Reported                                          |
|------------------------|---------------------------------------------------|---------------------------------------------------|
| Volume                 | 2206.8 (3)                                        | 2206.8 (3)                                        |
| Space group            | P 21/c                                            | P 21/c                                            |
| Hall group             | -P 2ybc                                           | -P 2ybc                                           |
| Moiety formula         | C <sub>25</sub> H <sub>22</sub> Cl N <sub>5</sub> | ?                                                 |
| Sum formula            | C <sub>25</sub> H <sub>22</sub> Cl N <sub>5</sub> | C <sub>25</sub> H <sub>22</sub> Cl N <sub>5</sub> |
| Mr                     | 427.93                                            | 427.92                                            |
| Dx, g cm <sup>-3</sup> | 1.288                                             | 1.288                                             |
| Z                      | 4                                                 | 4                                                 |
| Mu (mm <sup>-1</sup> ) | 0.195                                             | 0.195                                             |
| F <sub>000</sub>       | 896.0                                             | 896.0                                             |
| F <sub>000</sub> '     | 896.86                                            |                                                   |
| h, k, lmax             | 25, 17, 8                                         | 25, 17, 8                                         |
| Nref                   | 3888                                              | 3882                                              |
| Tmin, Tmax             | 0.954, 0.973                                      |                                                   |
| Tmin'                  | 0.951                                             |                                                   |

Correction method= Not given

Data completeness= 0.998

Theta(max)= 24.999

R(reflections)= 0.0424 ( 2407)

wR2(reflections)=  
0.1147 ( 3882)

S = 0.862

Npar= 288

4.  $^1\text{H}$  NMR,  $^{13}\text{C}$  NMR of products 5a, 6 and 8

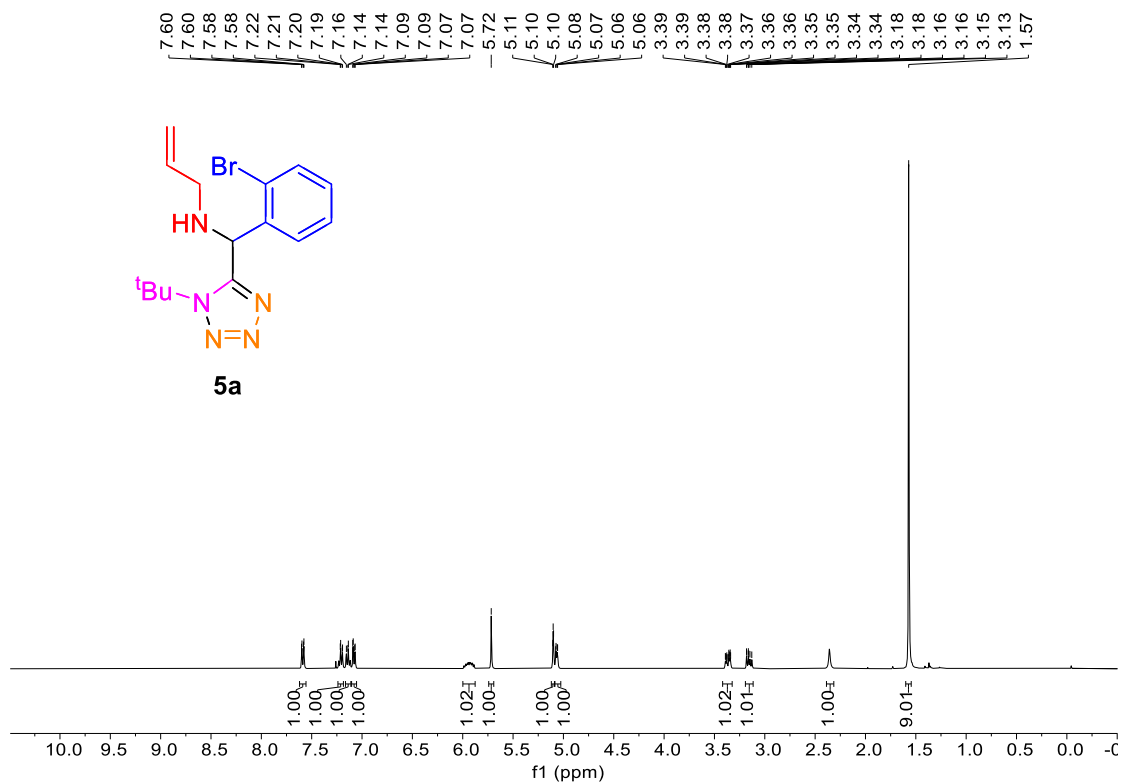

maxinoming08\_35.fid  
njw

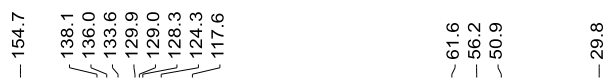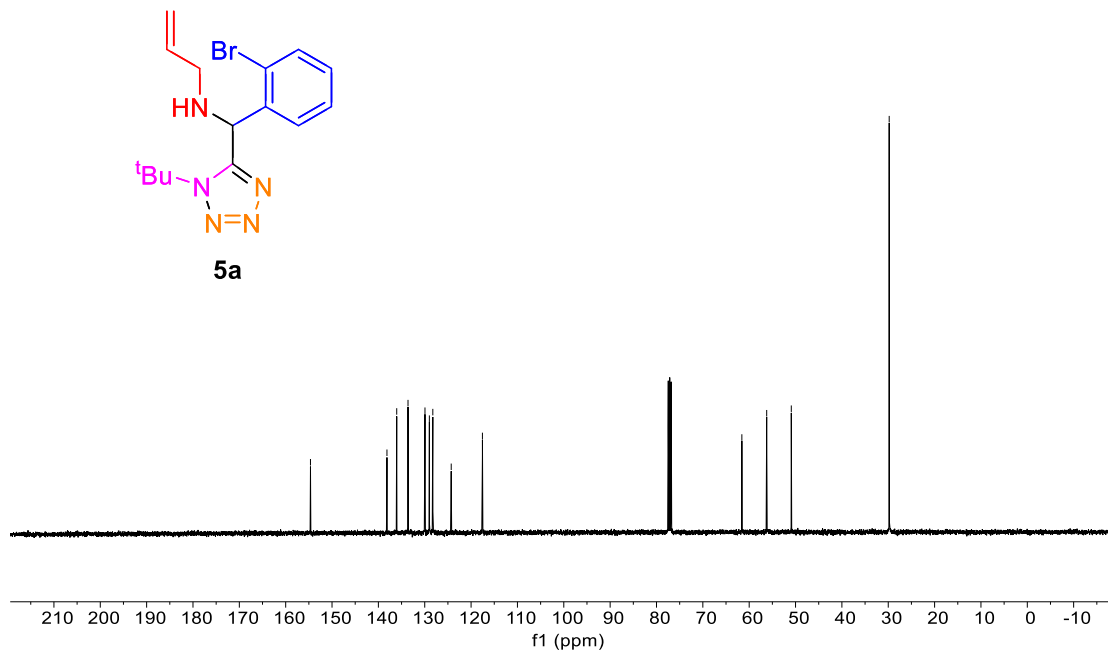

maxiaoming08\_6.fid  
njw-2

7.74  
7.74  
7.72  
7.72  
7.18  
7.17  
6.67  
6.65  
5.74  
5.61  
5.04  
3.81  
3.78  
3.68  
1.85

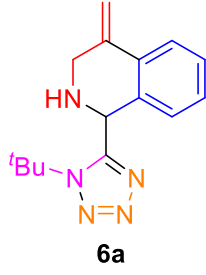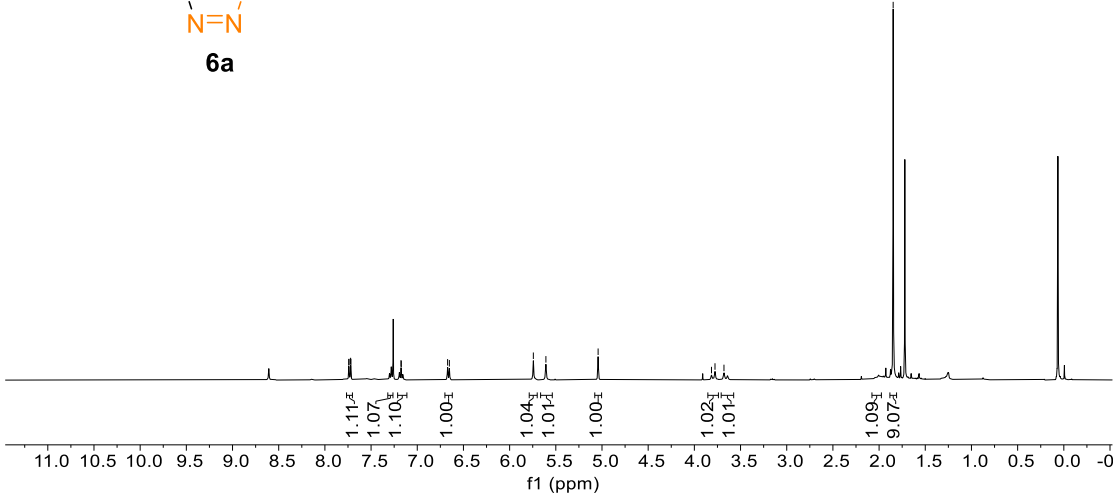

maxiaoming08\_150.fid  
njw-1 c

155.5  
138.8  
133.9  
133.0  
128.2  
128.0  
126.7  
124.5  
108.3  
62.1  
53.1  
48.6  
30.2

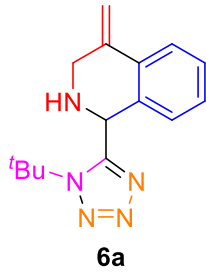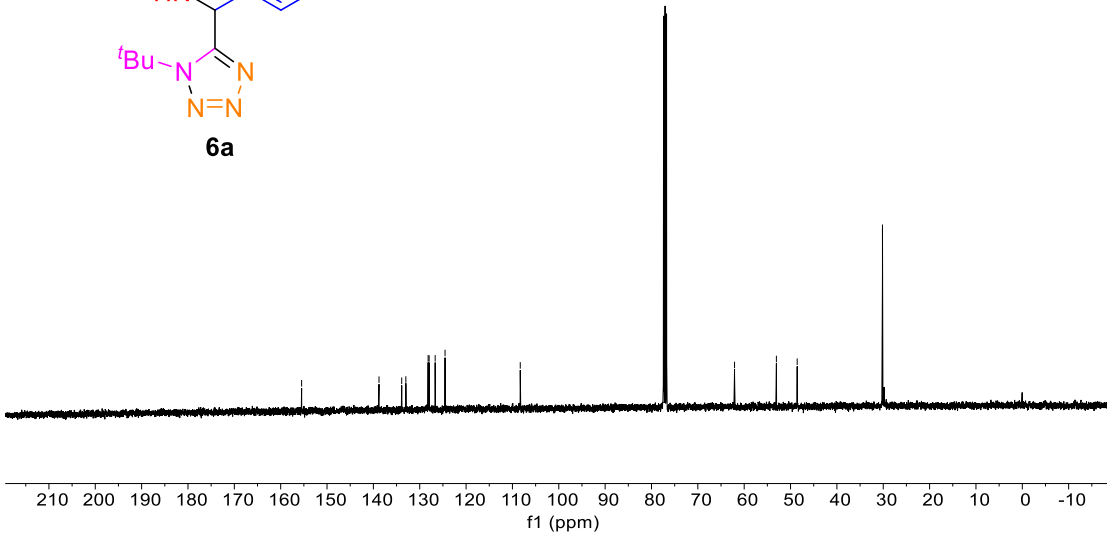

3maxim  
rwj-2

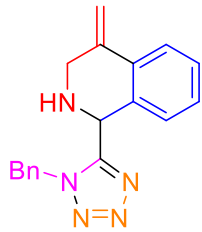

**6b**

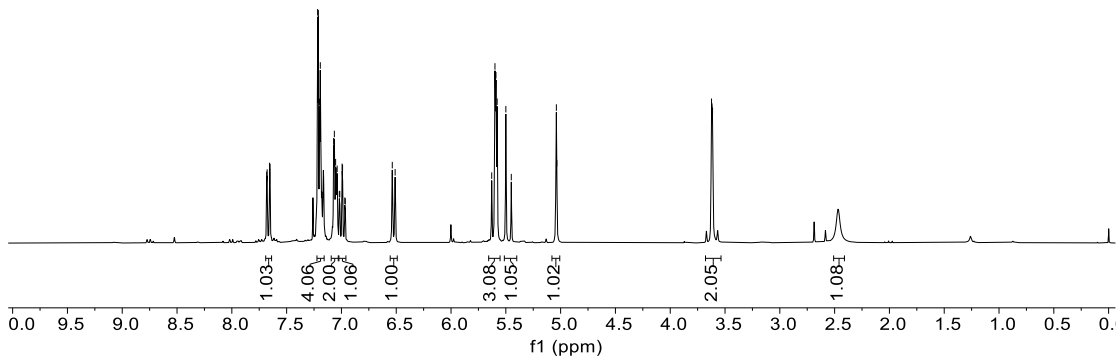

maxiaomg08\_148.fid  
rwj-2

150.4  
133.5  
128.4  
127.6  
126.9  
123.5  
123.2  
123.0  
122.9  
122.7  
121.9  
119.1  
- 103.2  
72.4  
72.1  
71.7  
47.1  
46.2  
43.6

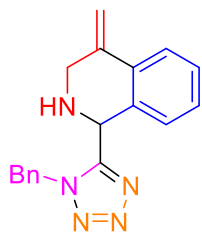

**6b**

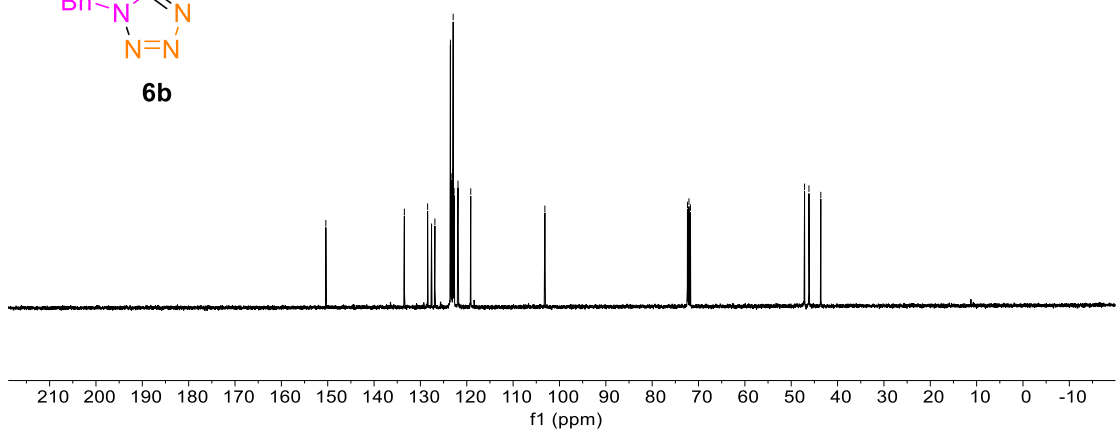

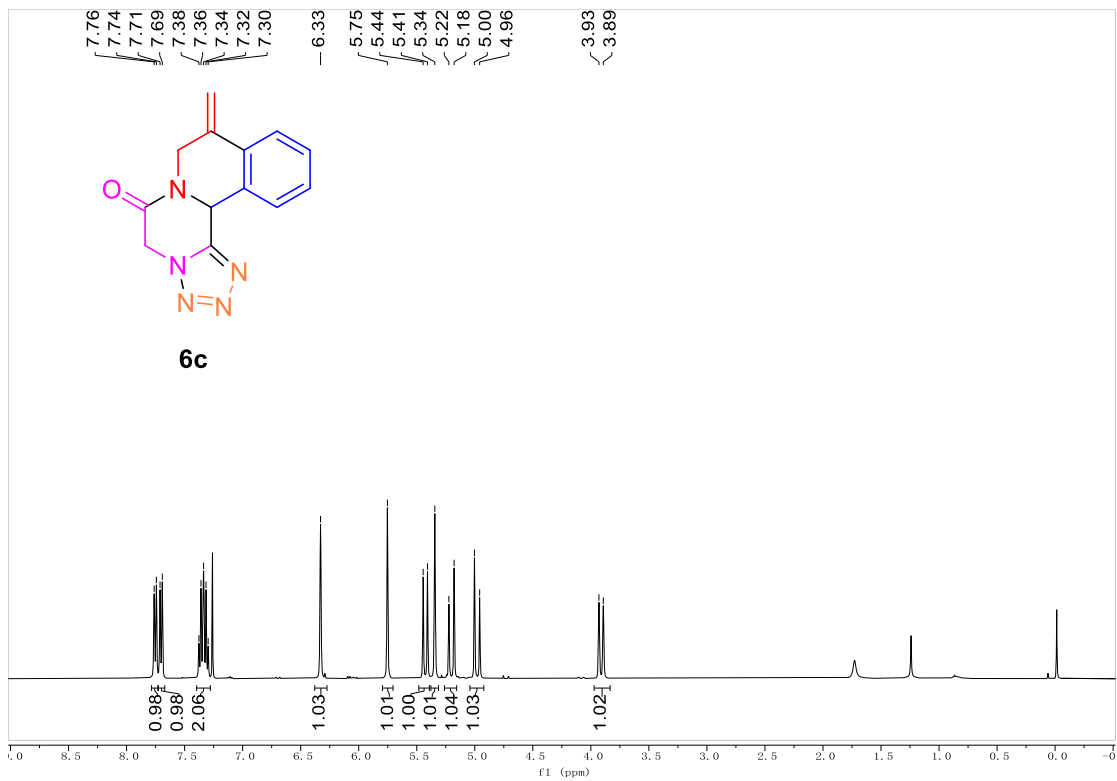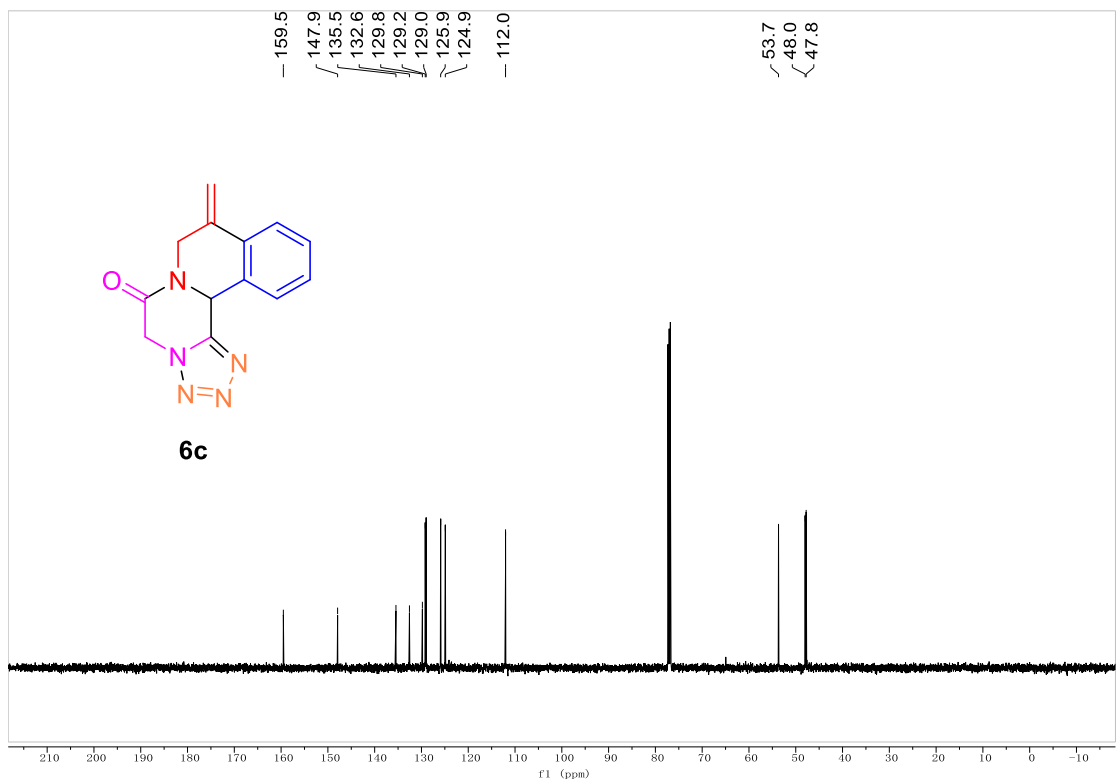

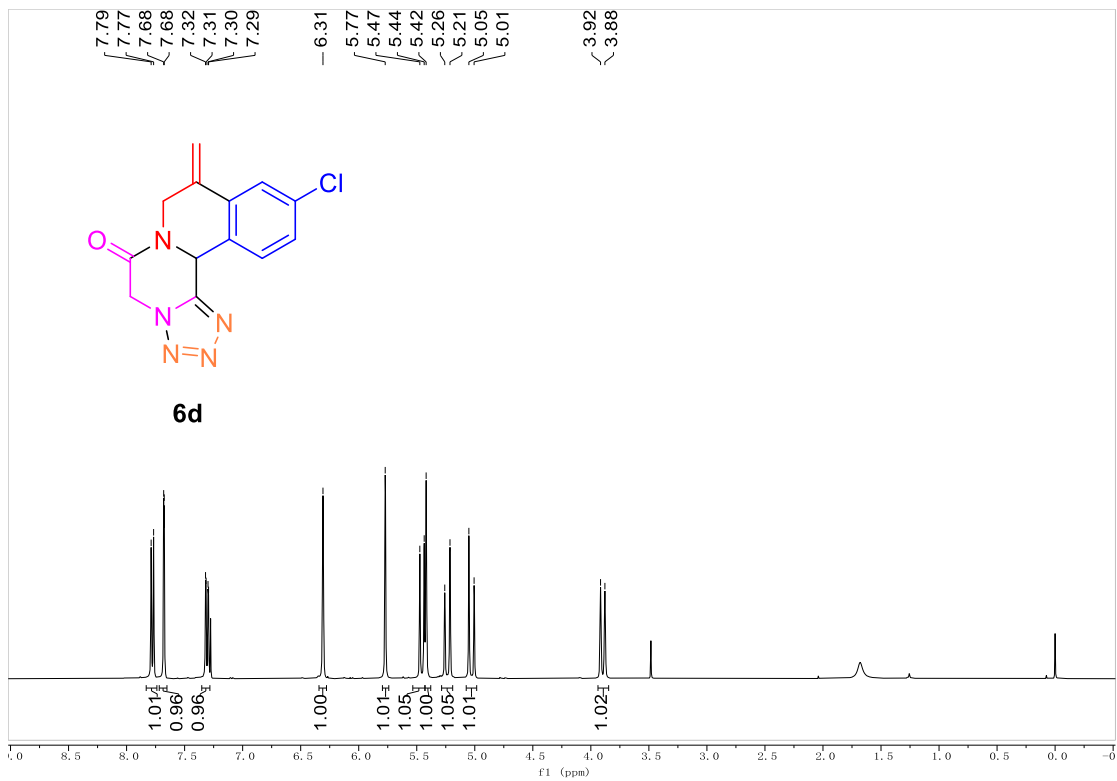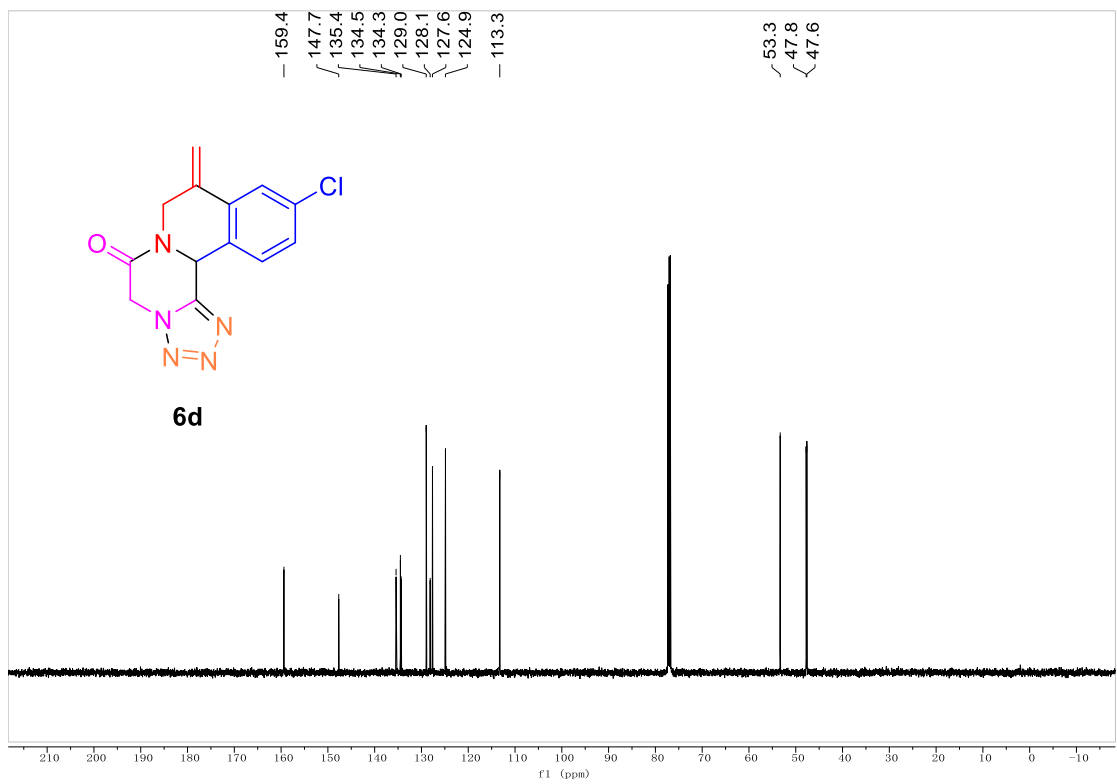

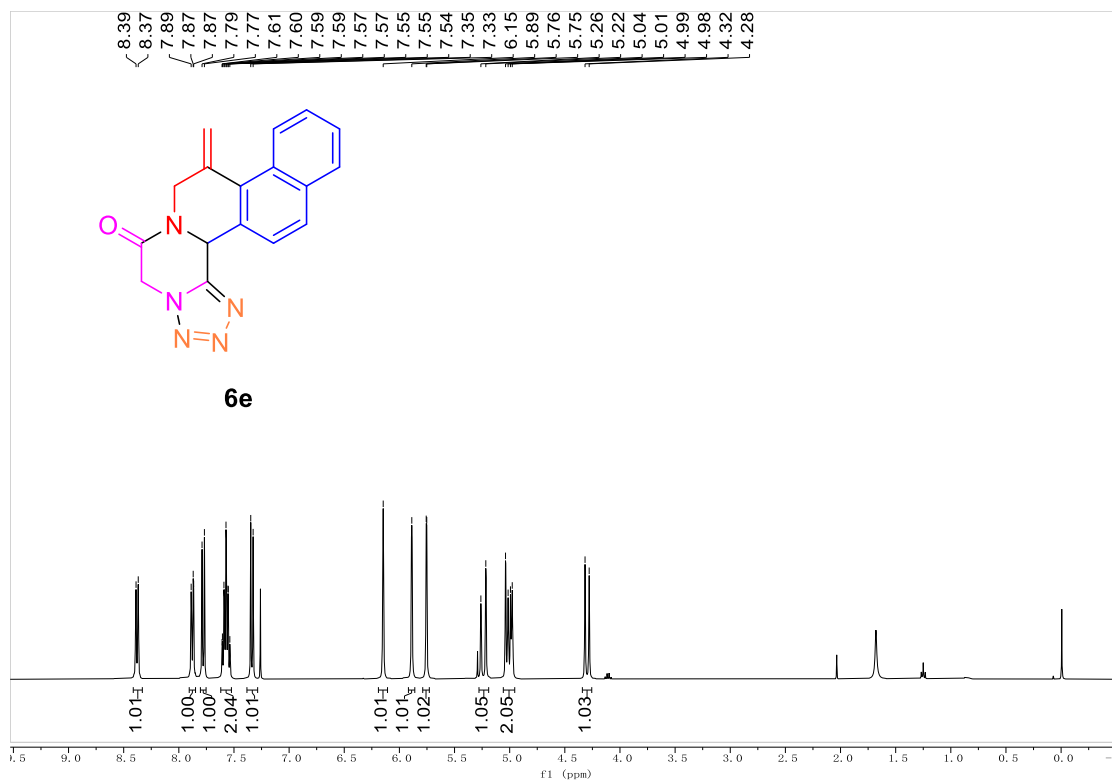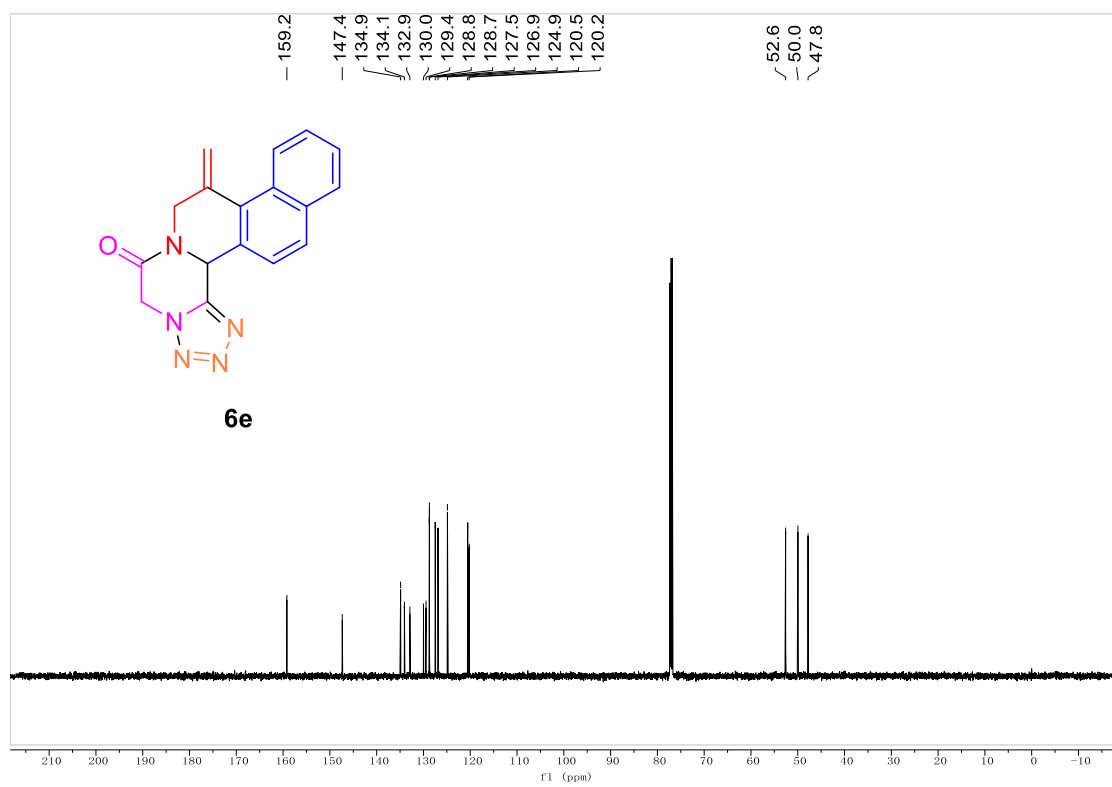

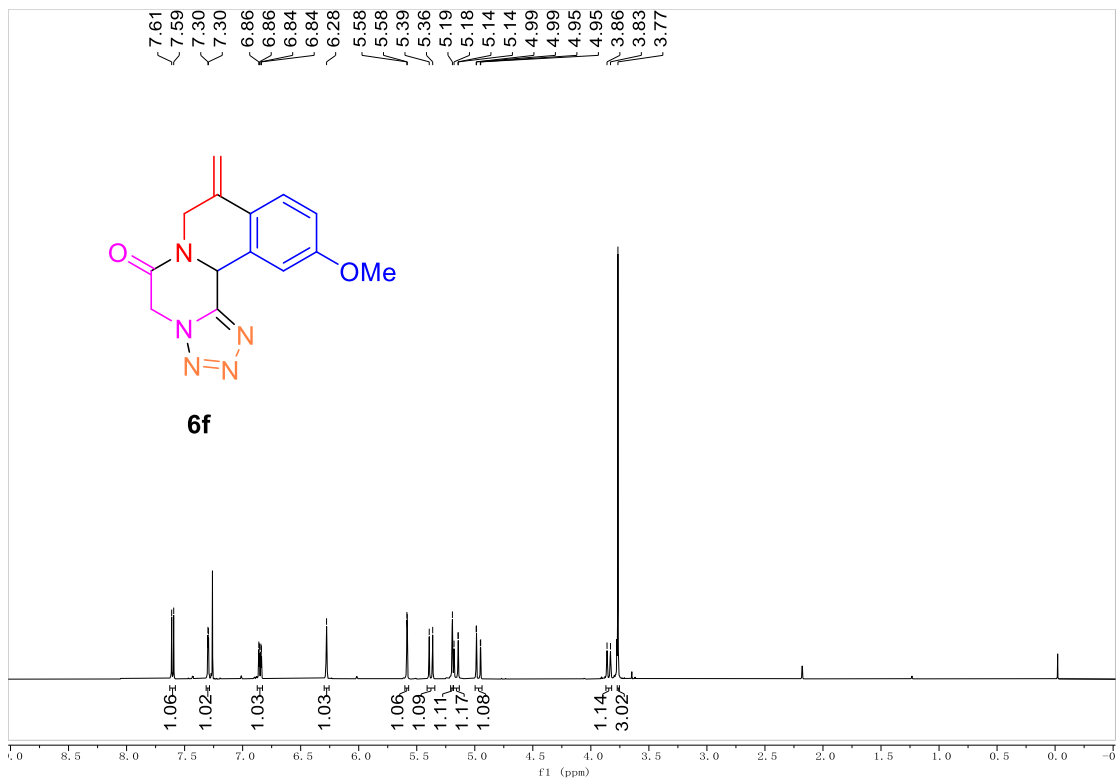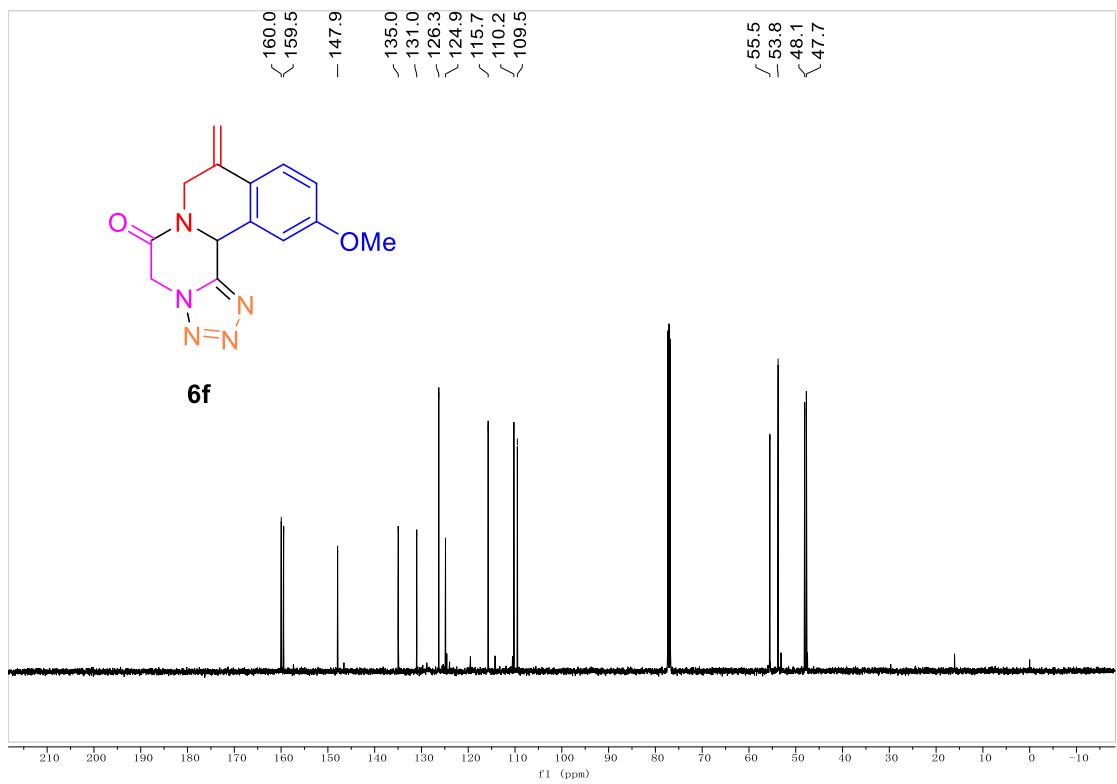



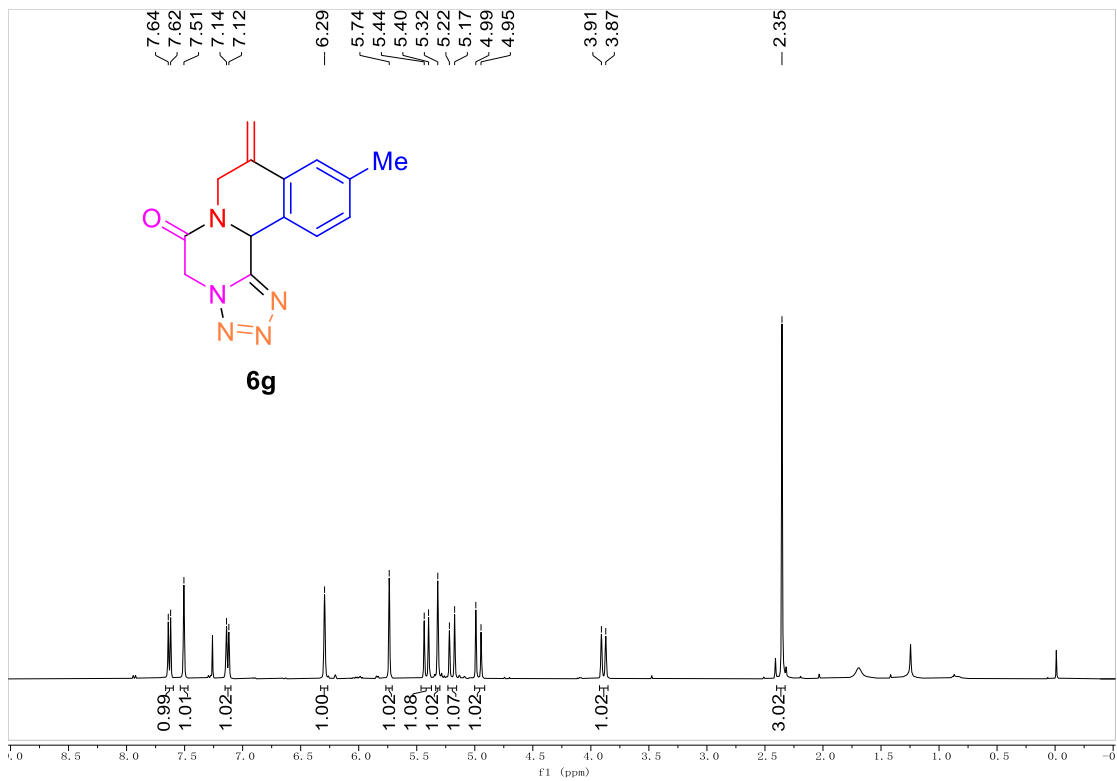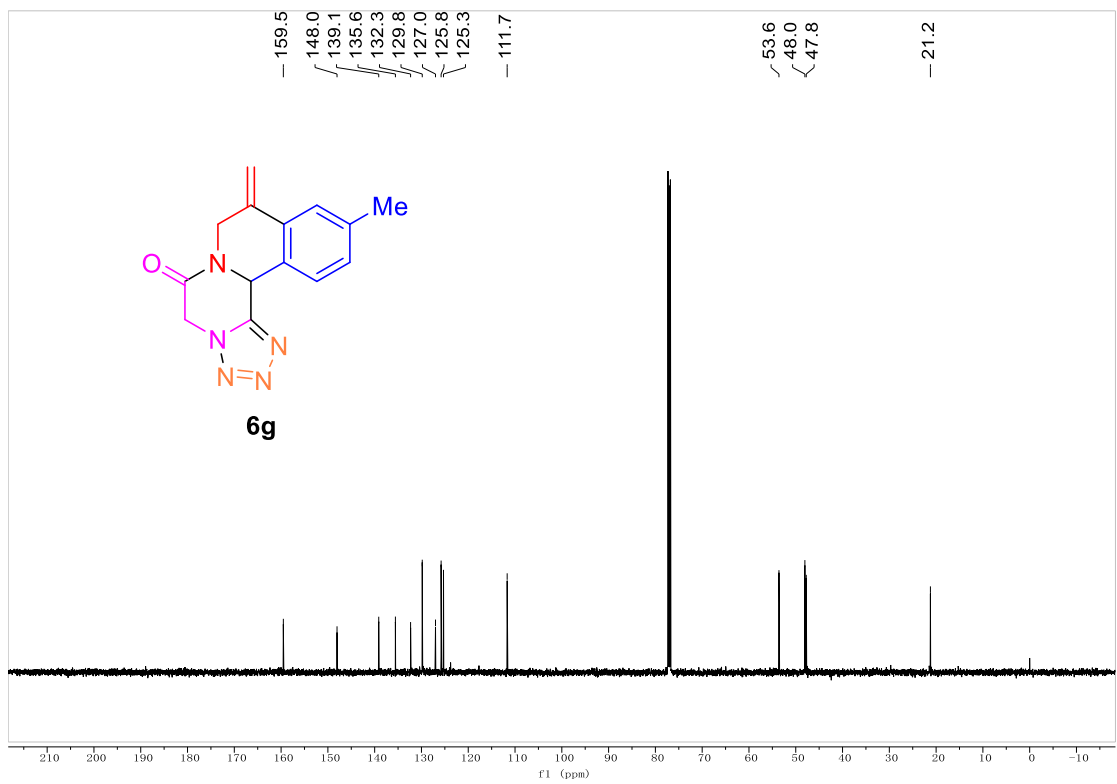



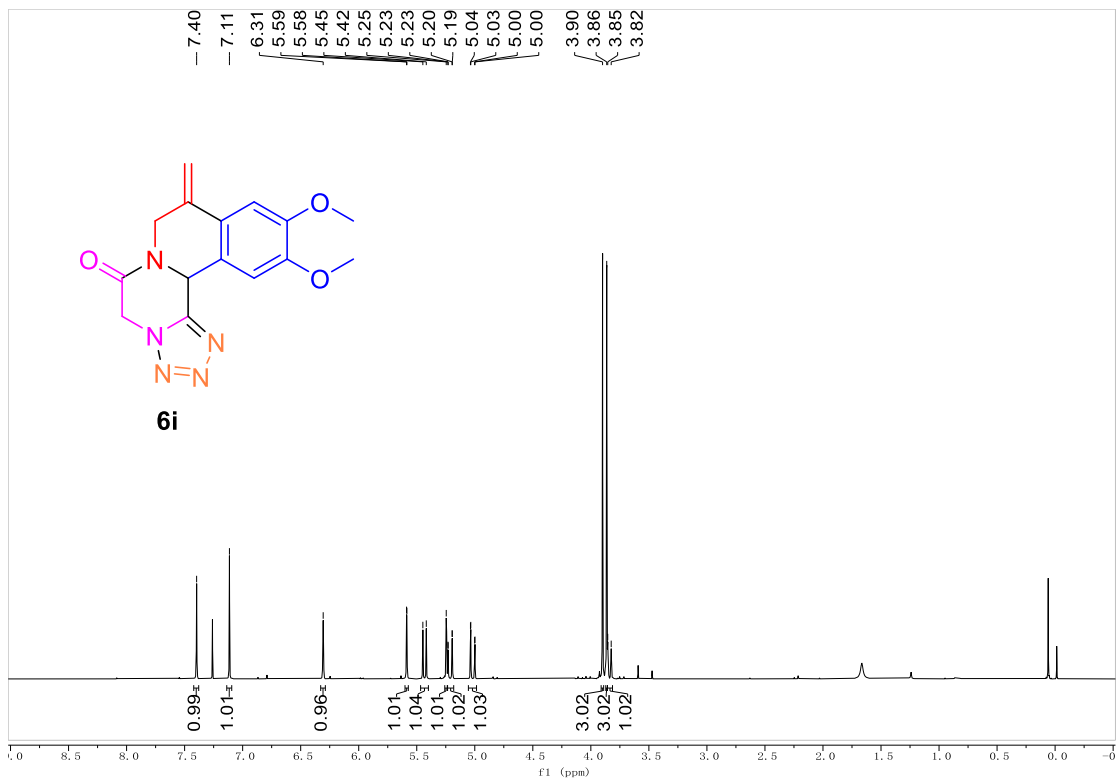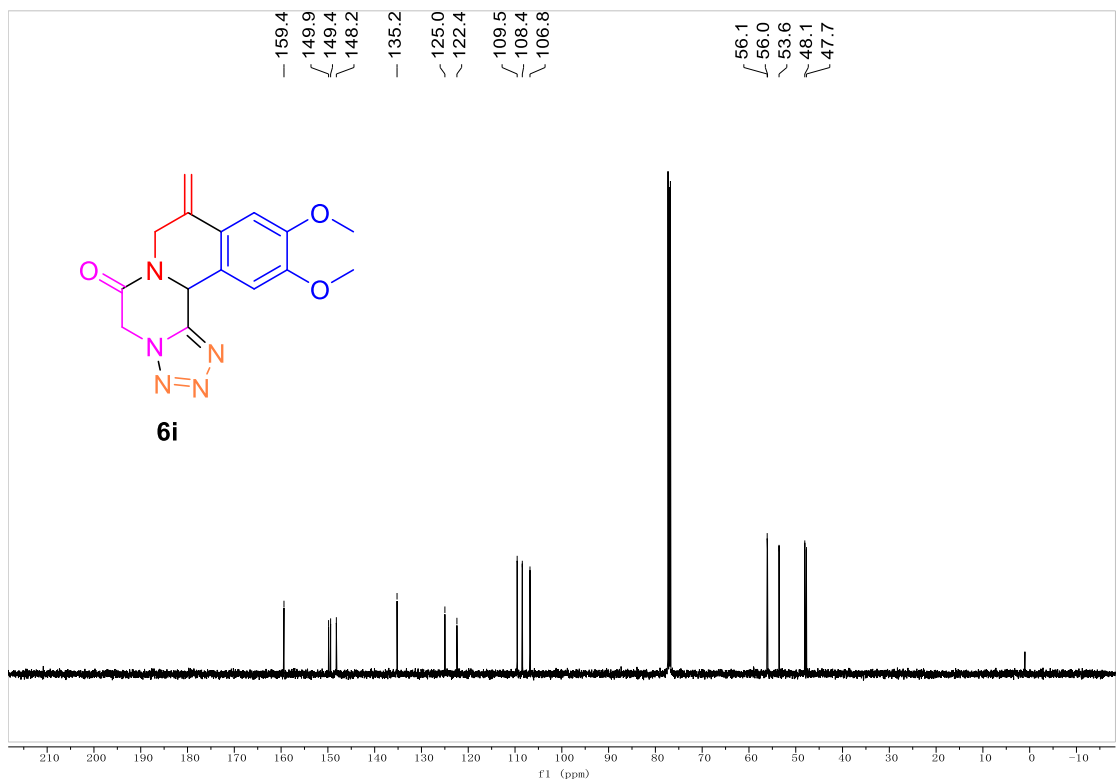

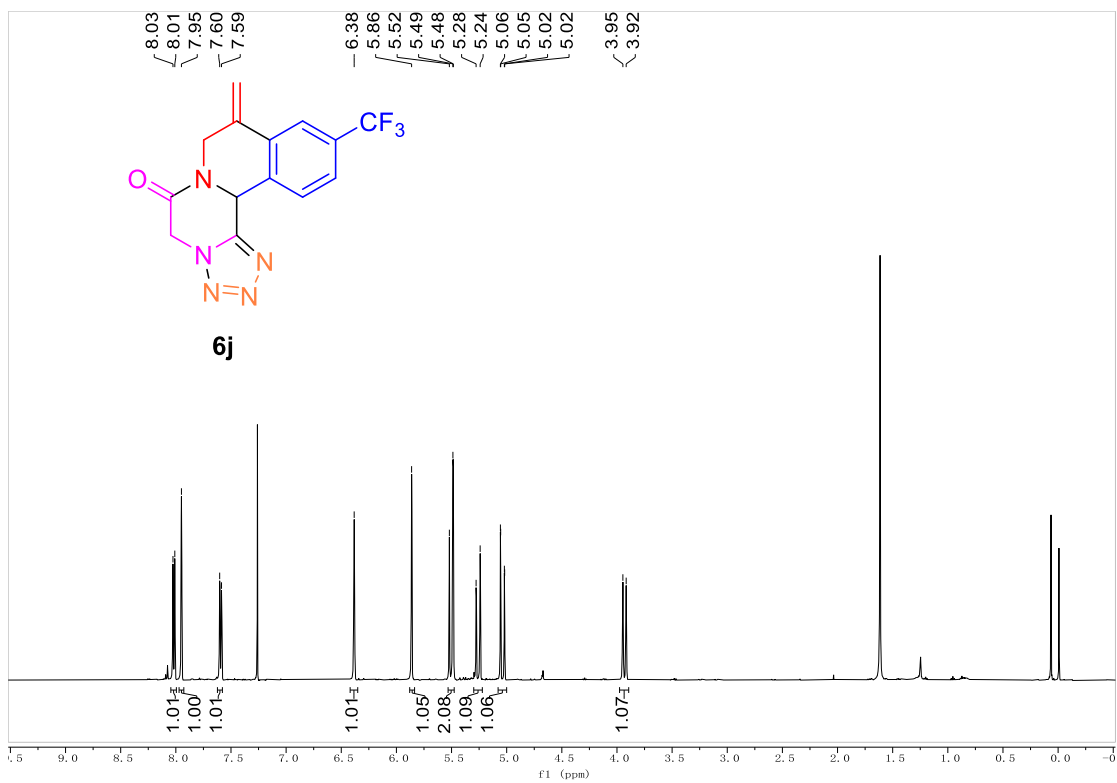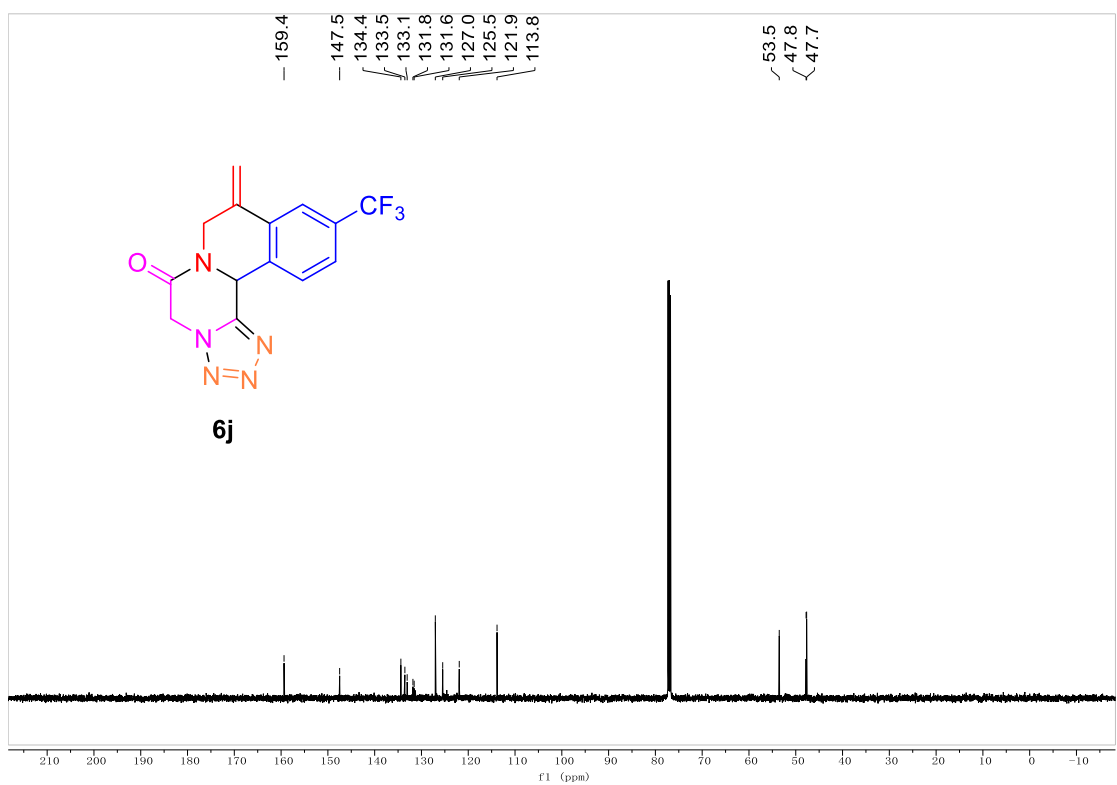

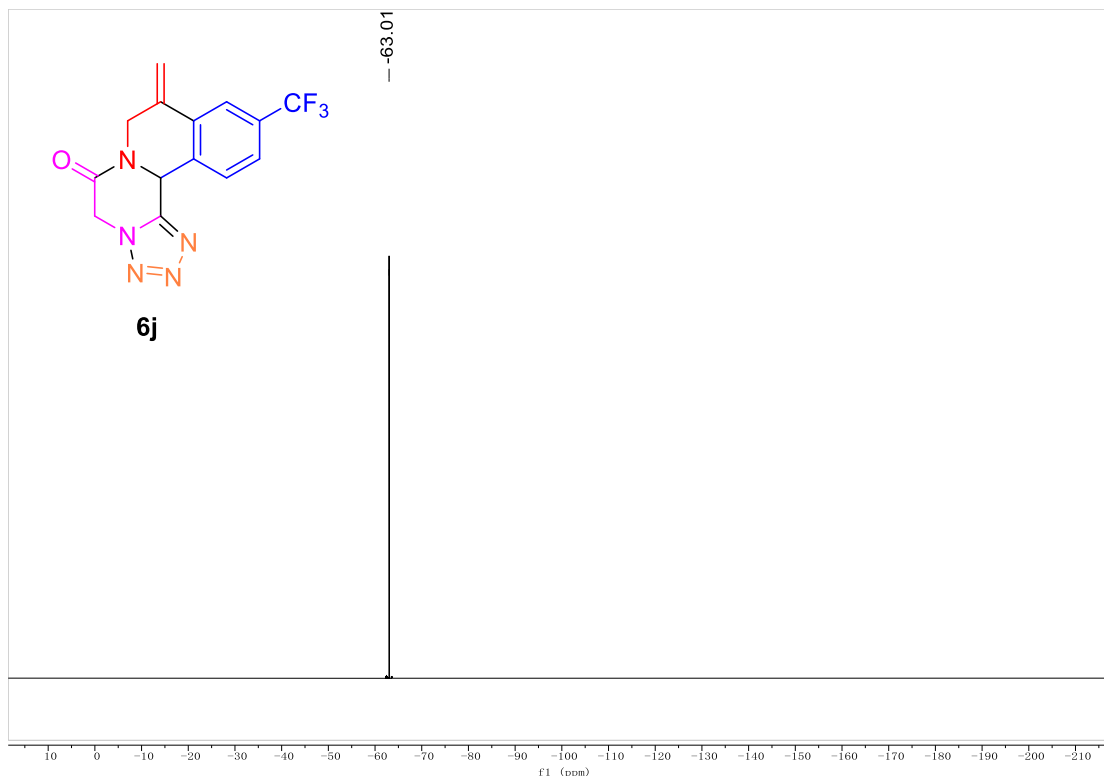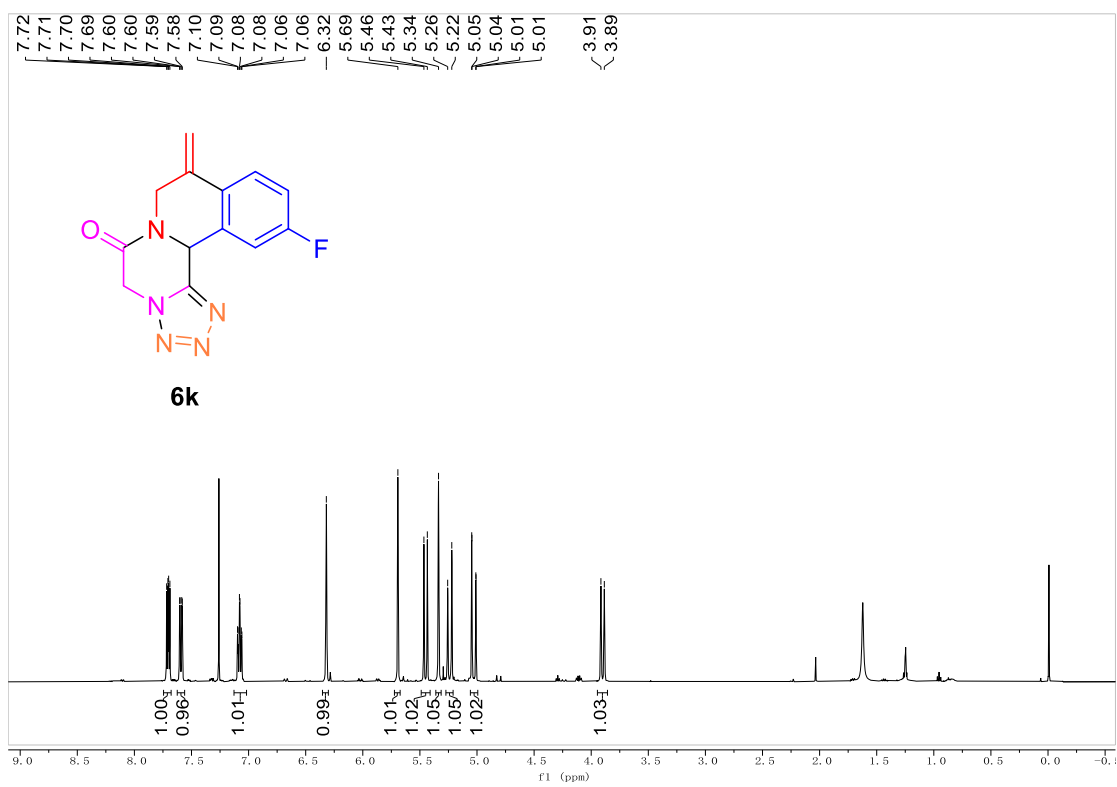

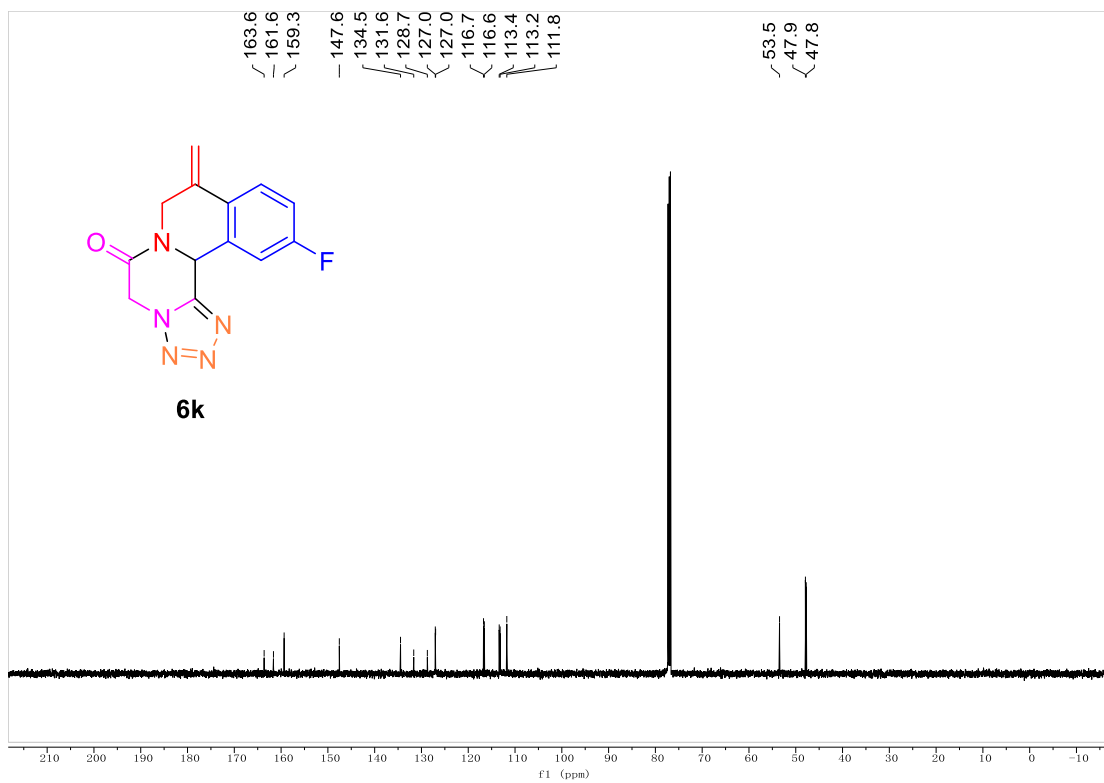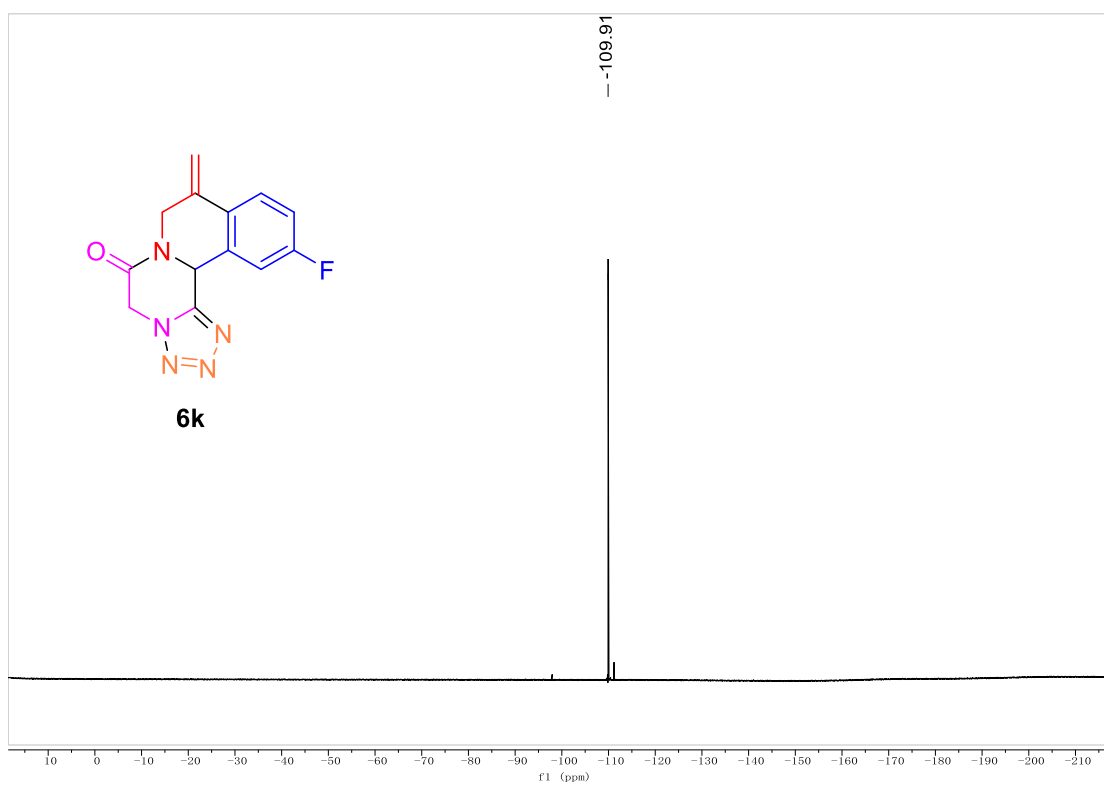

7.70  
7.68  
7.68  
7.34  
7.33  
7.32  
7.22  
7.21  
7.20  
7.18  
7.16  
7.03  
7.03  
6.83  
6.81  
6.54  
6.52  
5.70  
5.60  
5.56  
5.36  
5.25  
5.21  
5.09  
3.76  
3.72  
3.69  
3.65  
3.53  
3.49  
3.26  
3.25  
3.22

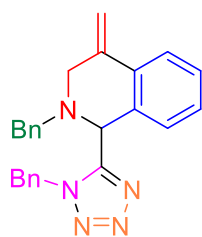

8a

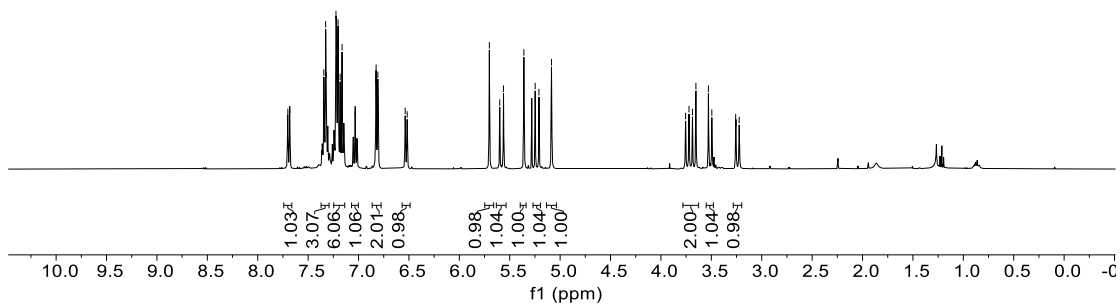

155.9  
137.7  
136.7  
135.1  
132.7  
130.8  
129.5  
129.1  
128.9  
128.8  
128.7  
128.6  
128.4  
128.2  
127.9  
124.2  
111.0  
57.5  
56.5  
51.4  
50.7

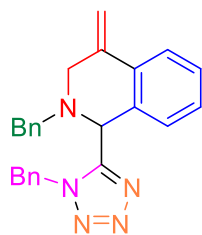

8a

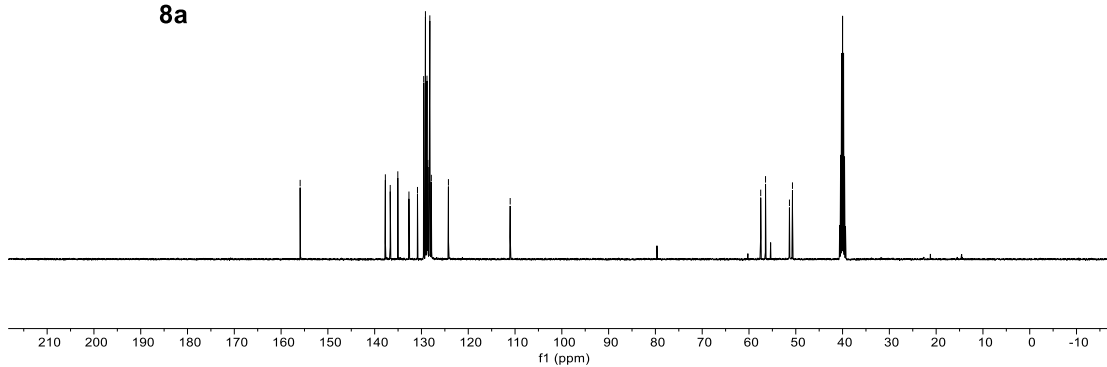

7.67  
7.67  
7.67  
7.31  
7.31  
7.30  
7.29  
7.29  
7.28  
7.27  
7.26  
7.16  
7.15  
7.04  
7.03  
7.02  
7.02  
7.01  
7.01  
6.65  
6.62  
5.77  
5.75  
5.72  
5.54  
5.51  
5.49  
4.99  
3.68  
3.64  
3.60  
3.59  
3.56  
3.54  
3.20  
3.15  
-2.31

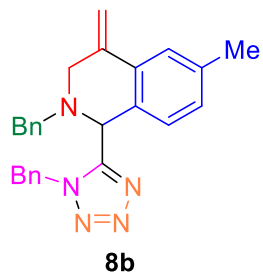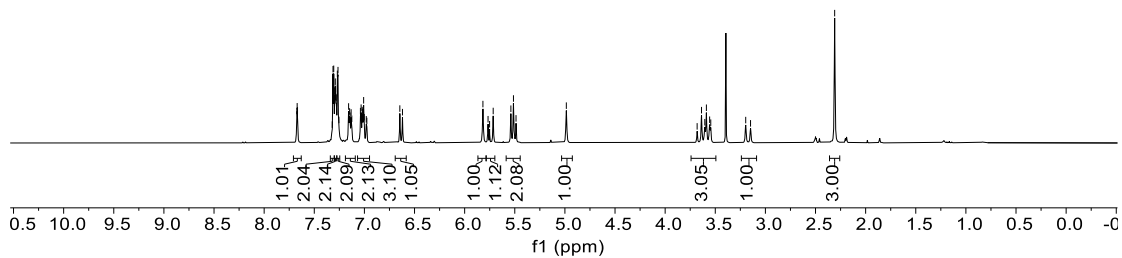

156.0  
137.7  
137.6  
136.9  
135.0  
132.4  
129.8  
129.5  
129.1  
129.0  
128.8  
128.6  
128.5  
128.2  
128.1  
127.9  
124.4  
-110.7  
57.6  
56.4  
51.6  
50.7  
-21.3

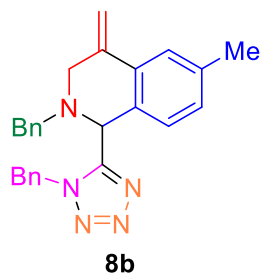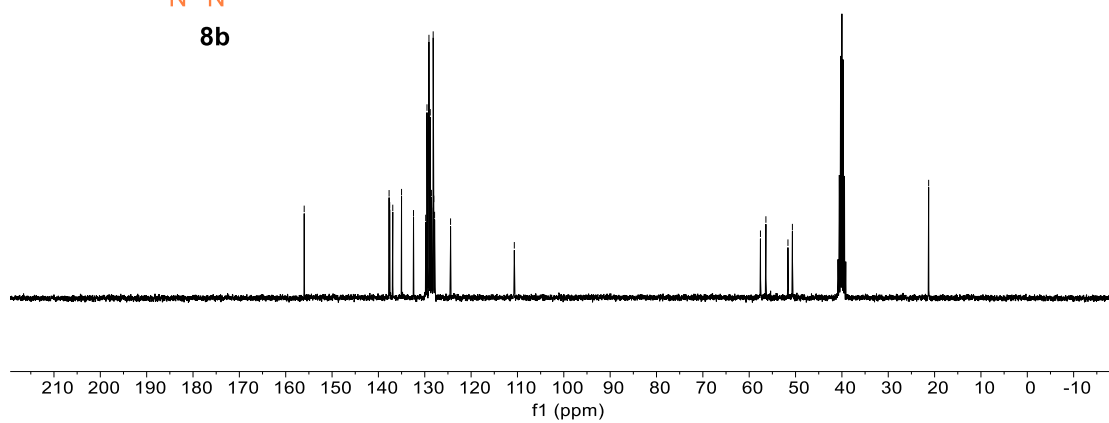



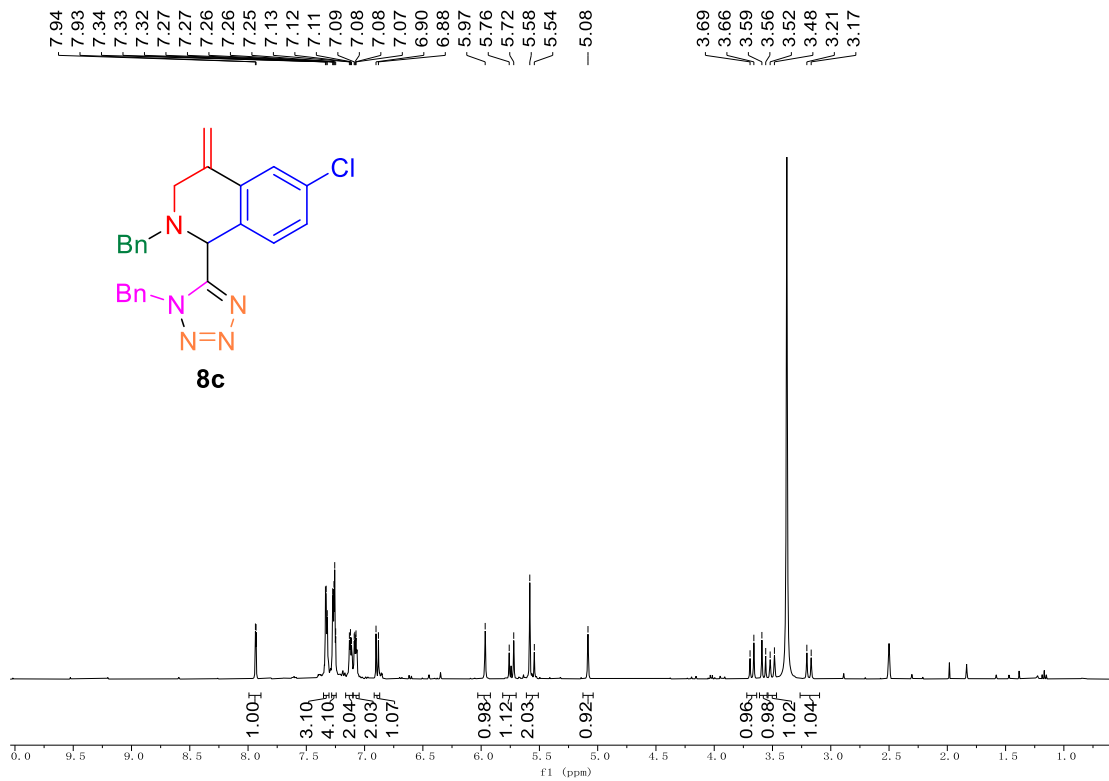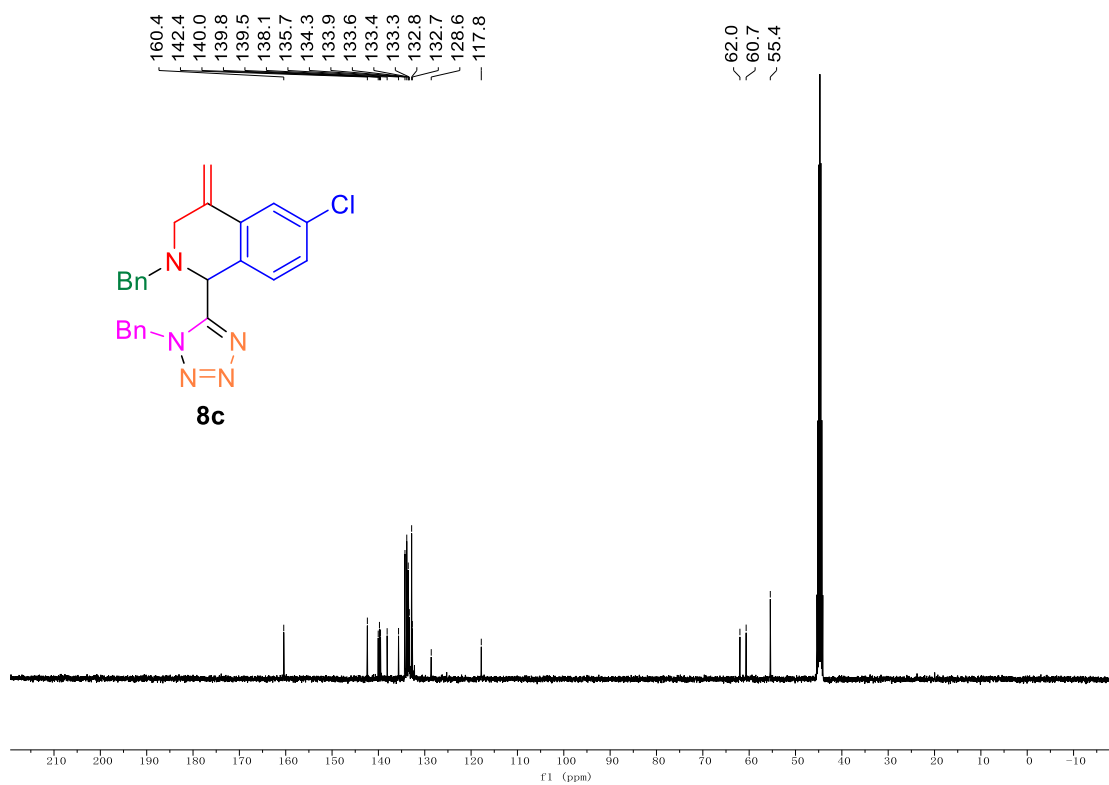

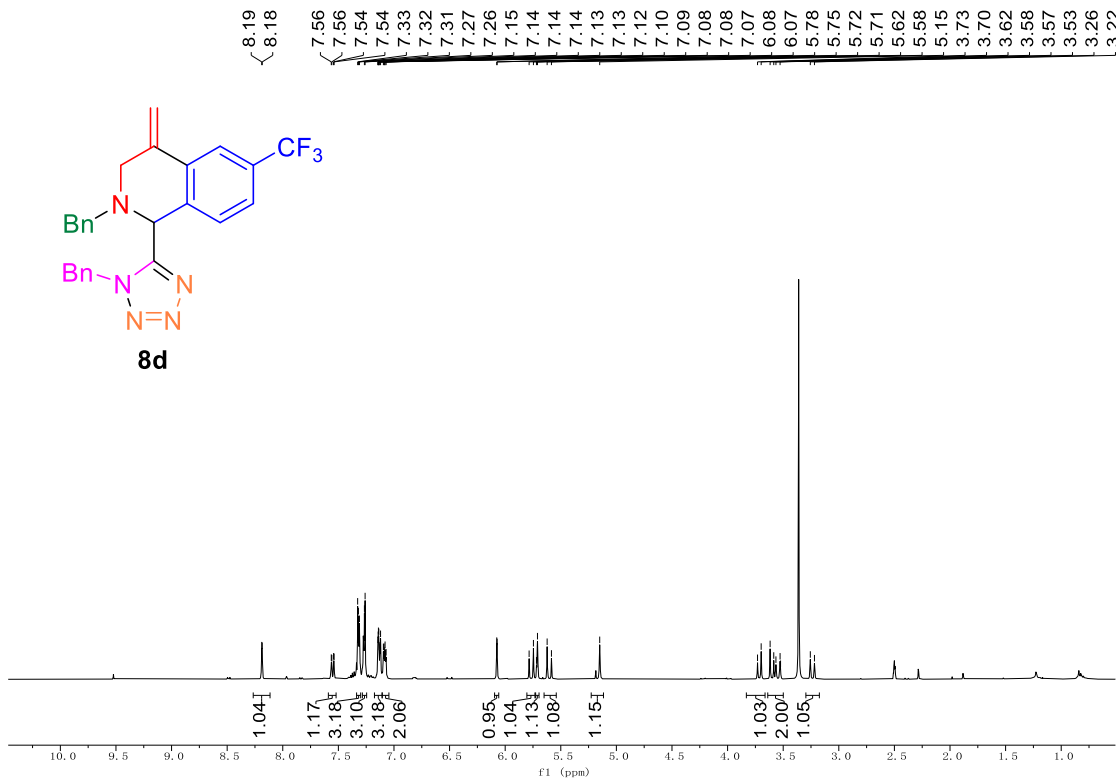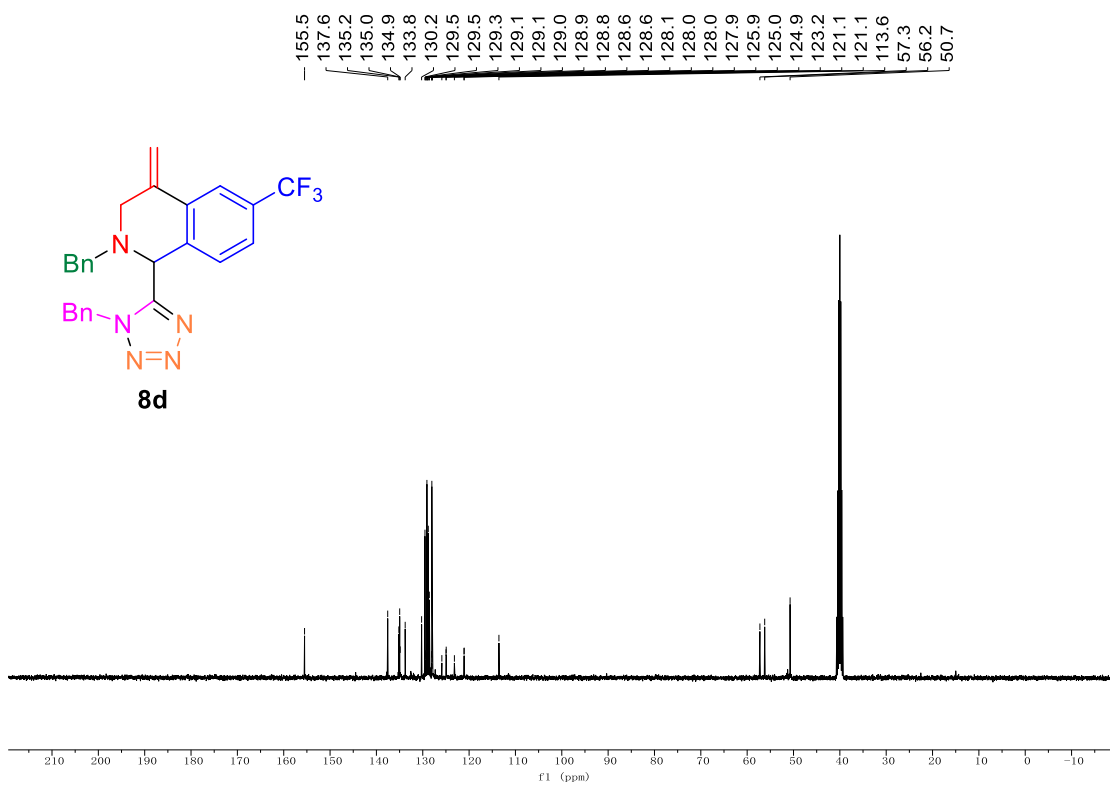

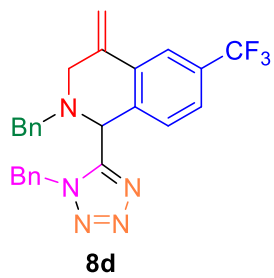

--61.13

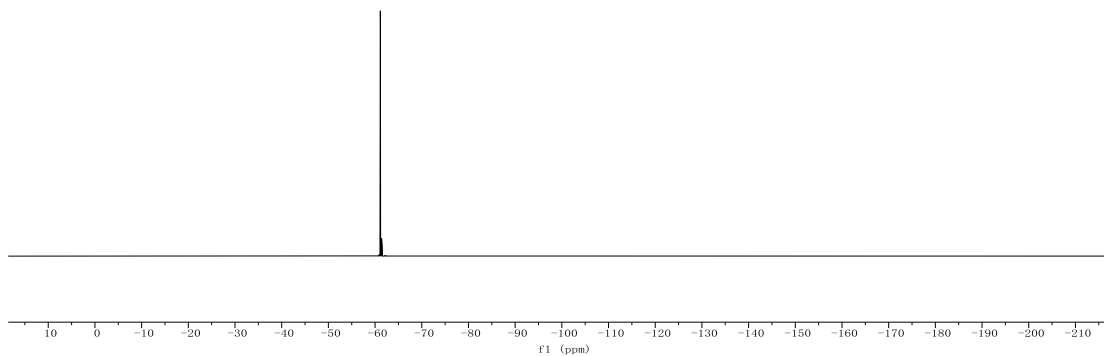

7.81  
7.79  
7.33  
7.32  
7.32  
7.31  
7.27  
7.27  
7.16  
7.15  
7.15  
7.14  
7.13  
7.07  
7.07  
7.06  
7.06  
7.06  
6.92  
6.92  
6.90  
6.89  
6.28  
6.27  
5.76  
5.74  
5.68  
5.54  
5.51  
5.50  
5.50  
4.87  
3.64  
3.61

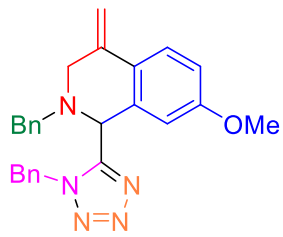

8e

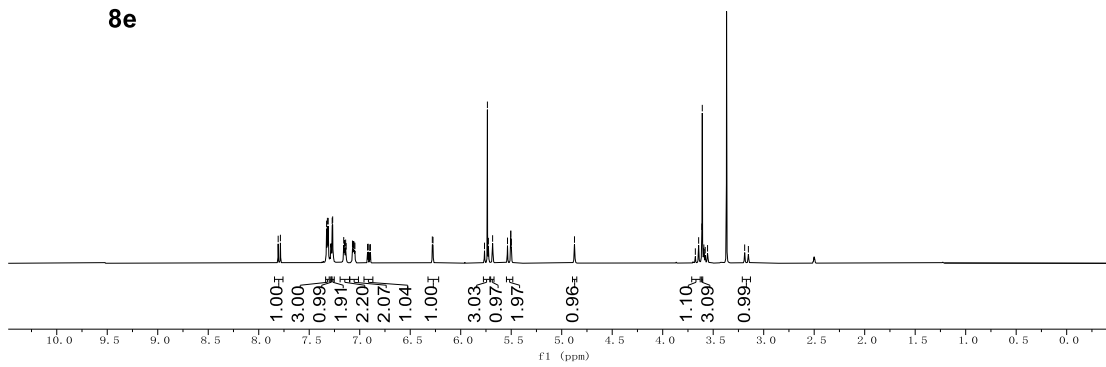

159.7  
155.8  
137.8  
136.3  
135.0  
132.2  
129.5  
129.1  
128.8  
128.6  
128.1  
127.9  
125.8  
125.5  
115.1  
112.7  
108.6  
57.5  
56.5  
55.6  
55.3  
51.5  
50.7

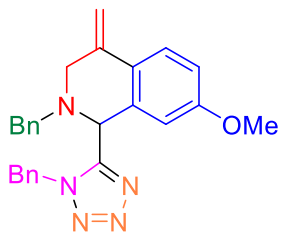

8e

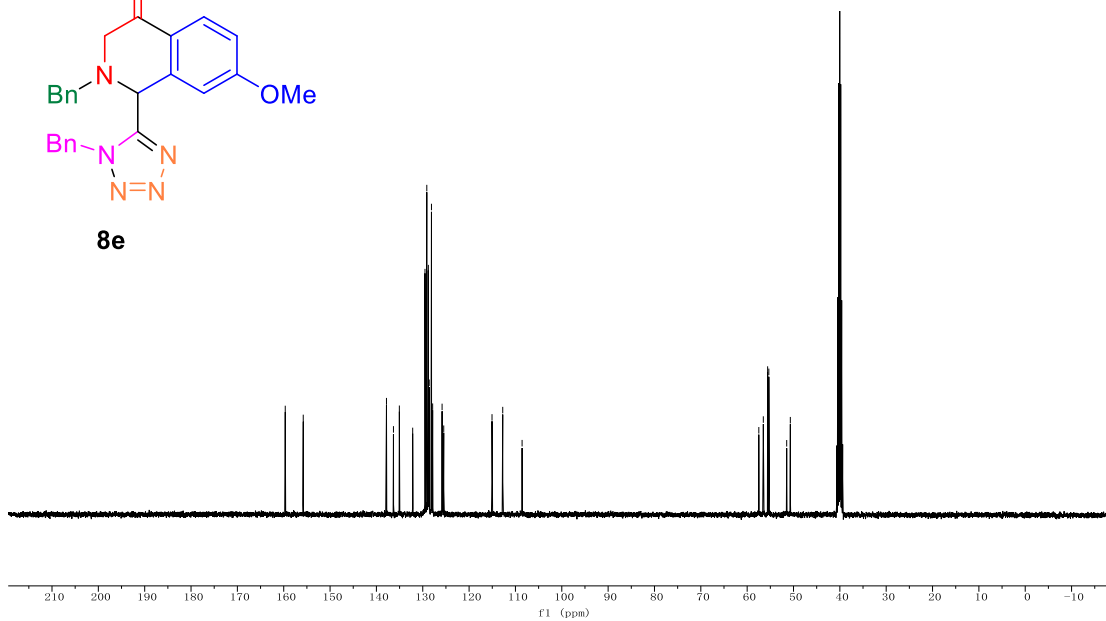

7.39  
7.34  
7.34  
7.33  
7.33  
7.32  
7.28  
7.28  
7.27  
7.26  
7.14  
7.14  
7.13  
7.13  
7.12  
7.07  
7.07  
7.06  
7.06  
7.05  
6.27  
6.02  
6.02  
5.98  
5.97  
5.73  
5.71  
5.69  
5.53  
5.50  
5.50  
5.42  
4.89  
3.68  
3.64  
3.60  
3.56  
3.53  
3.53  
3.49  
3.49  
3.16  
3.12

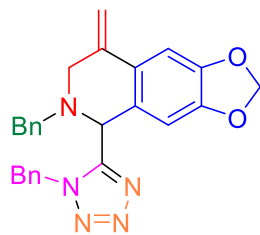

8f

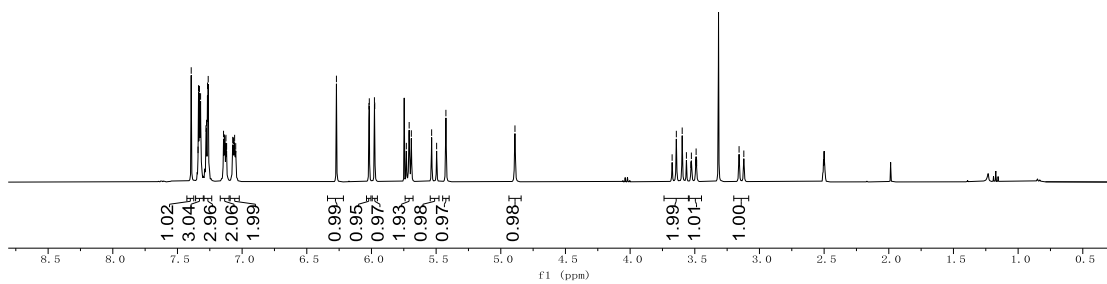

155.91  
148.05  
147.98  
137.82  
136.38  
135.10  
129.54  
129.10  
128.79  
128.55  
128.08  
127.87  
126.96  
124.67  
109.69  
107.83  
103.73  
101.71  
57.36  
56.48  
51.29  
50.64

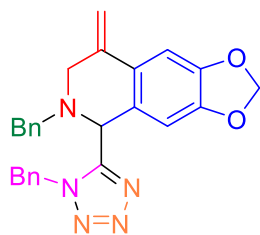

8f

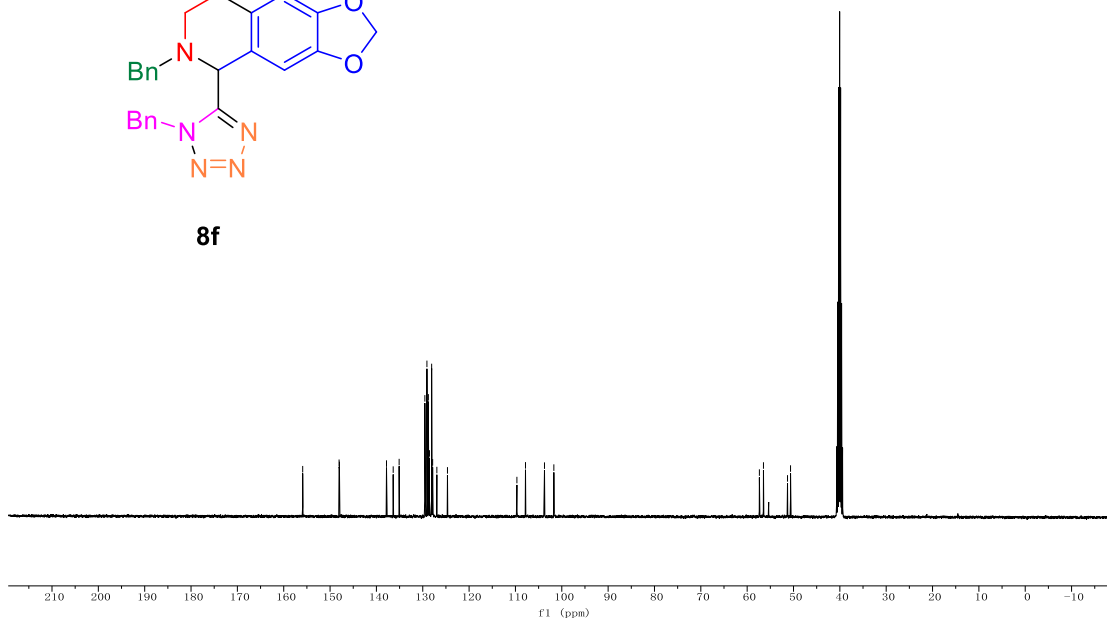

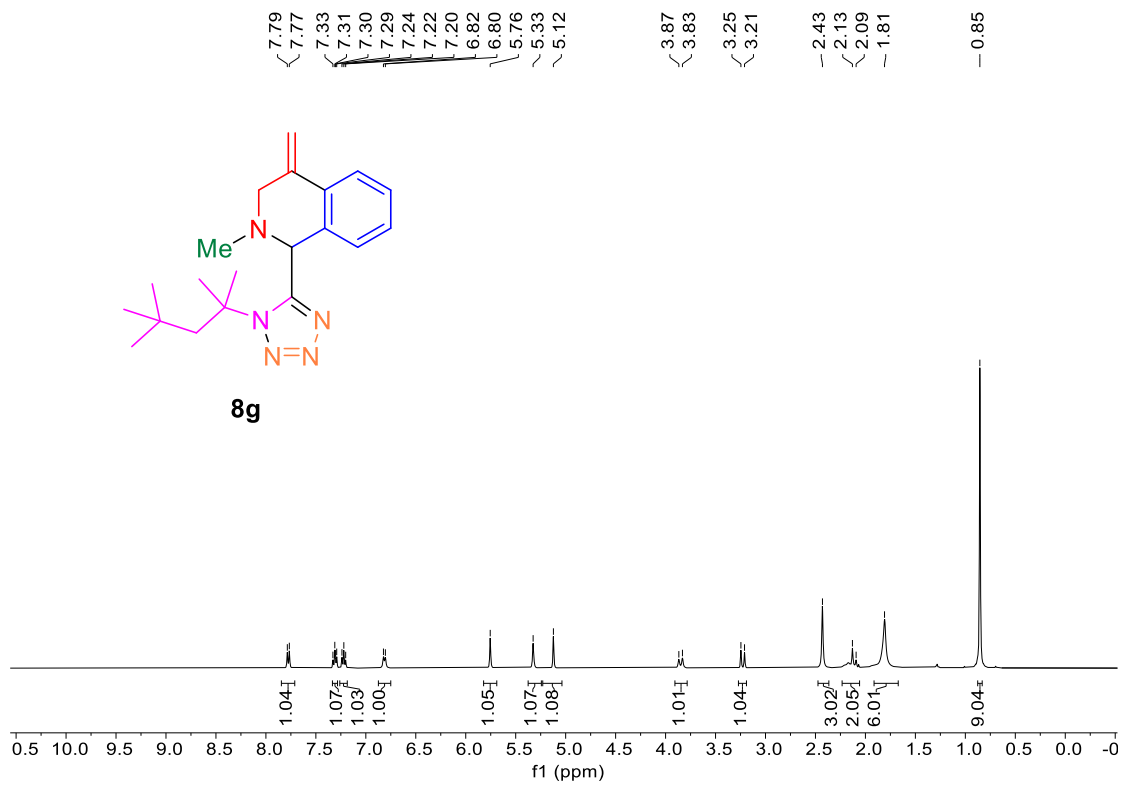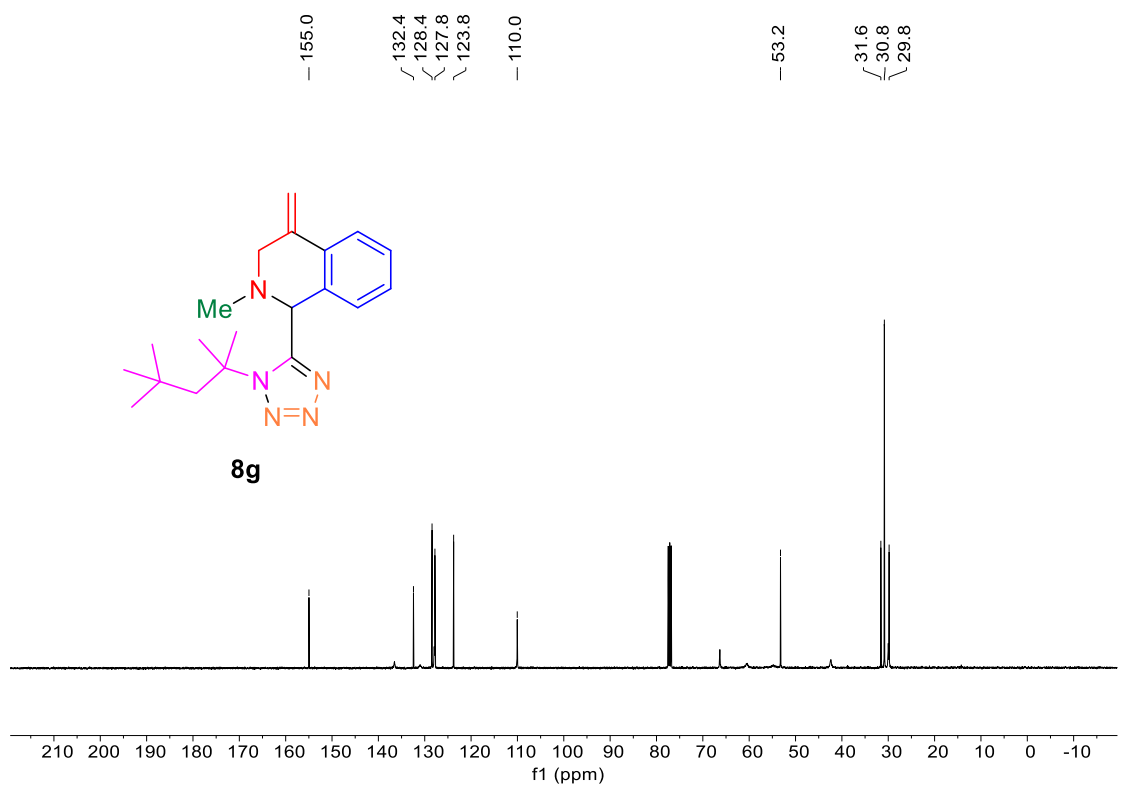

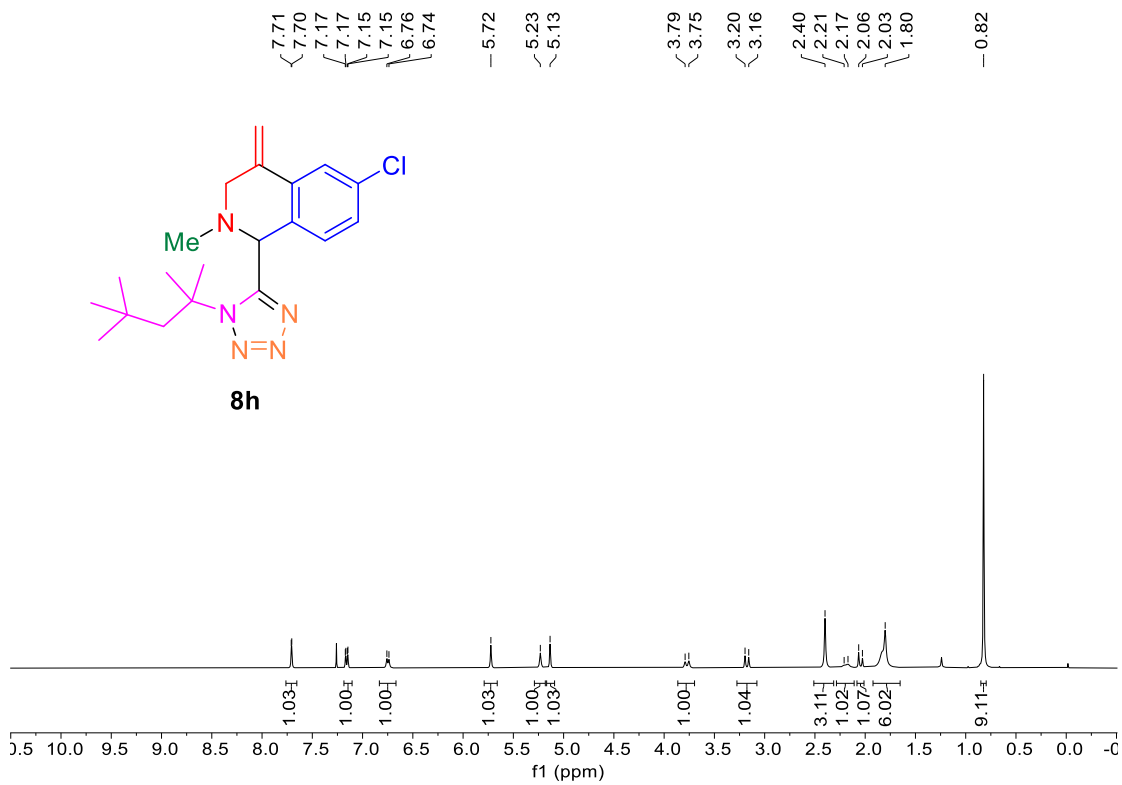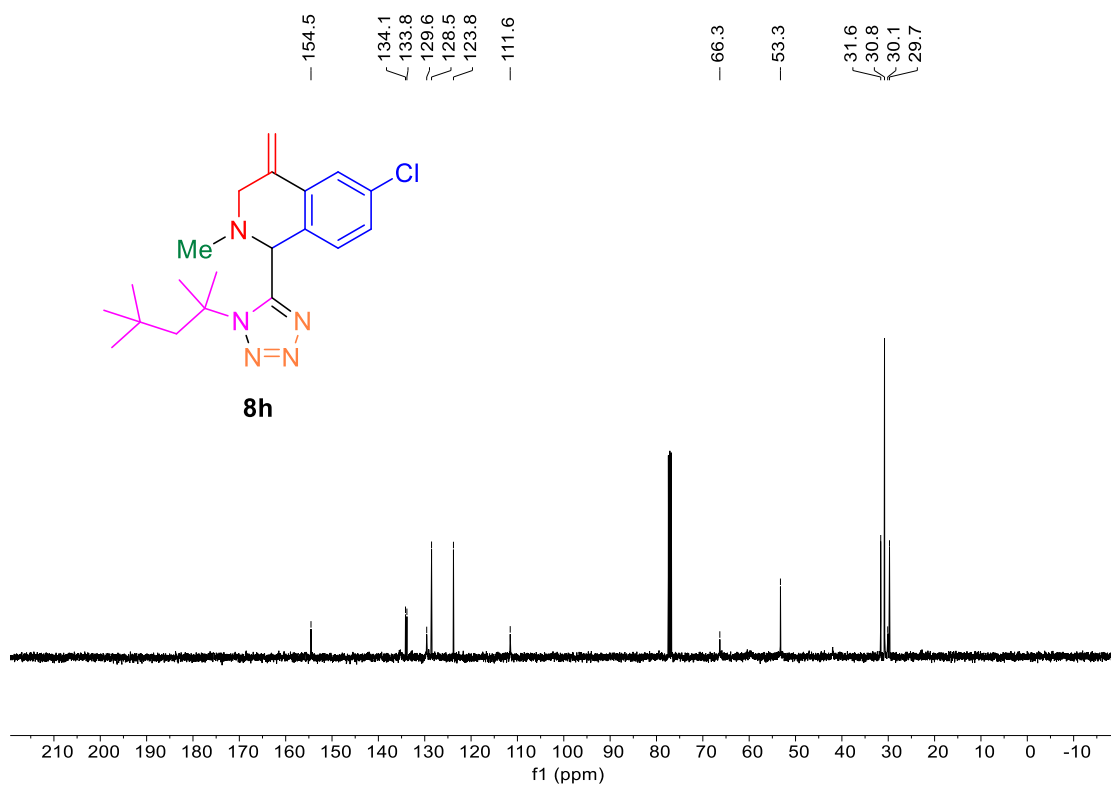

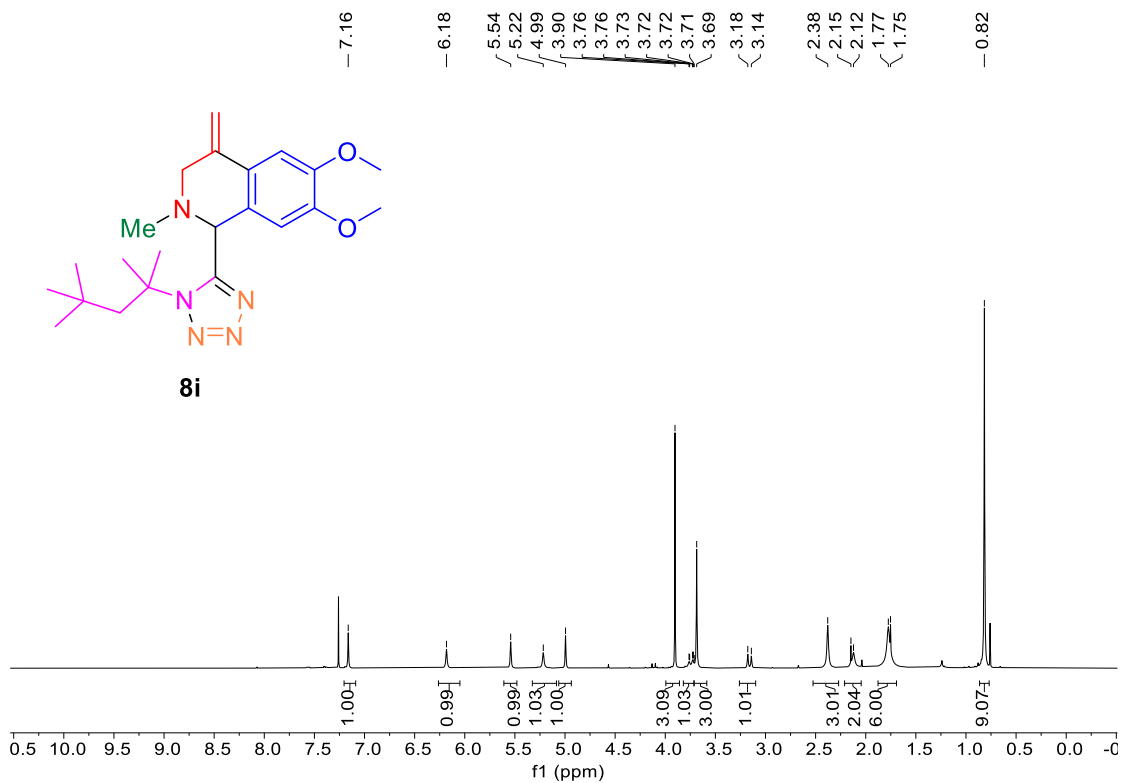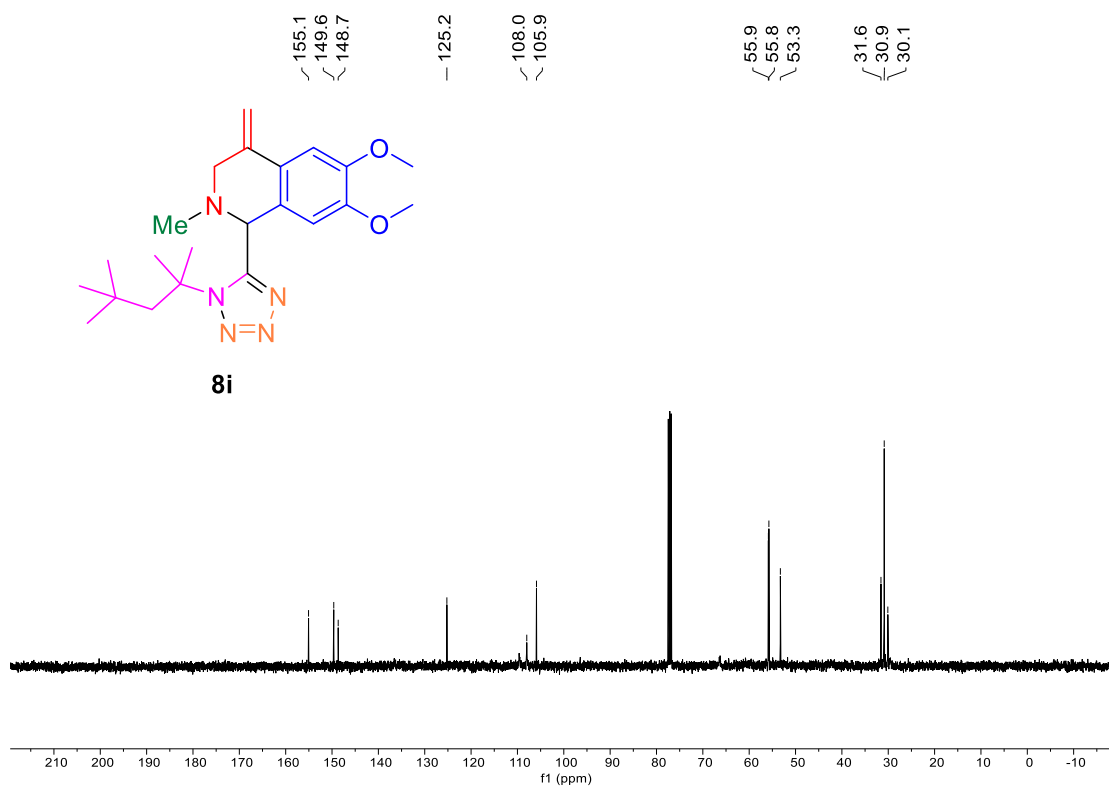



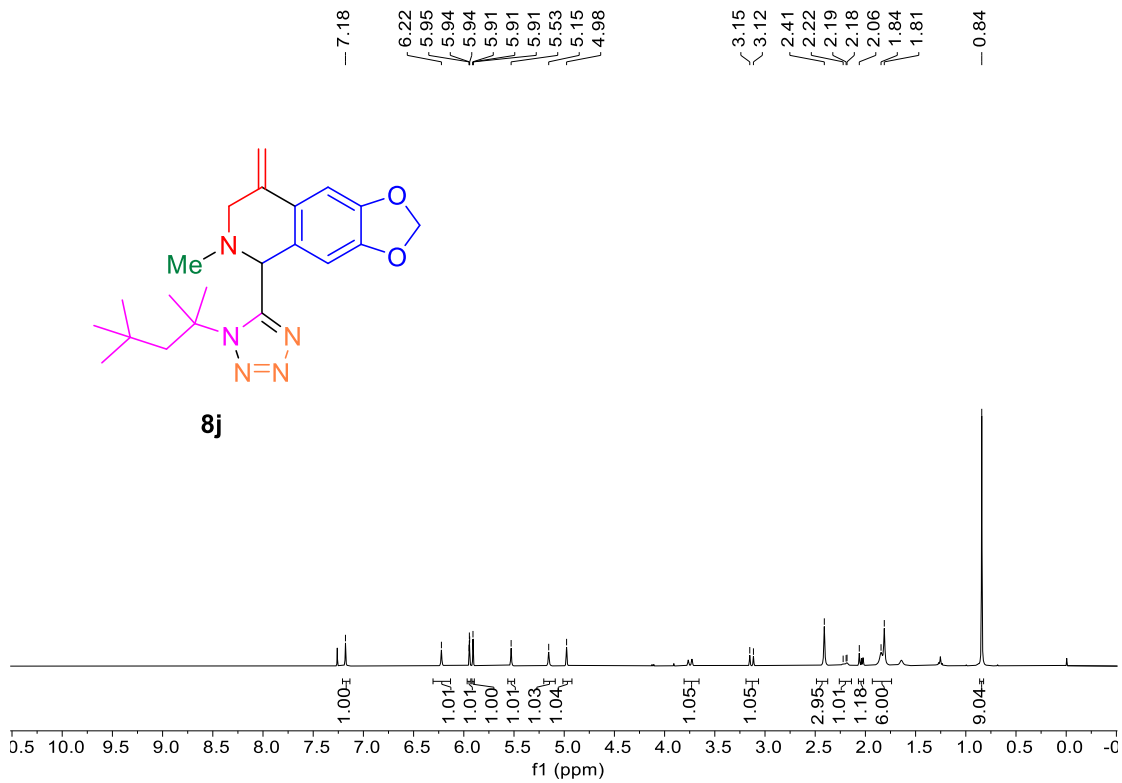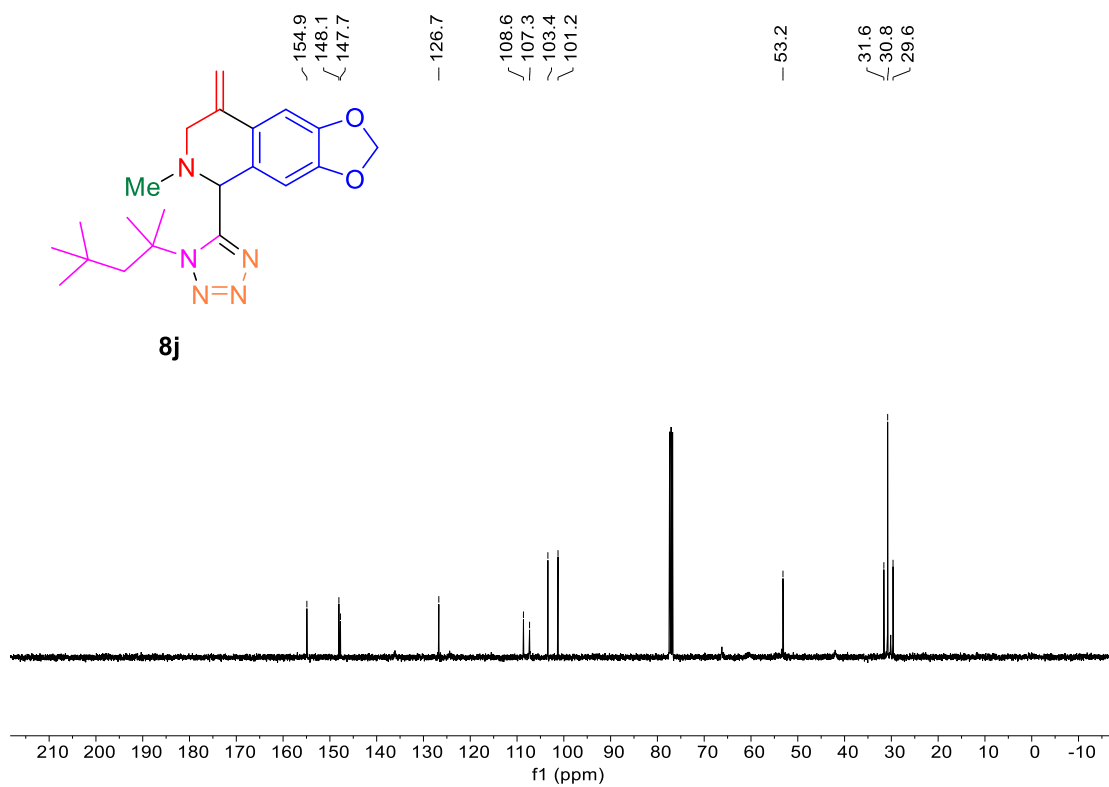

Supplement: Additional file 1 [file 1860-5397-20-81-S1.pdf]
